# Supplementary material for: Cycloaddition Strategies for the Synthesis of Diverse Heterocyclic Spirocycles for Fragment‐Based Drug Discovery
Source: PubMed Central journal article supplement (PMC6774287; doi:10.1002/ejoc.201900847), 2019-07-29

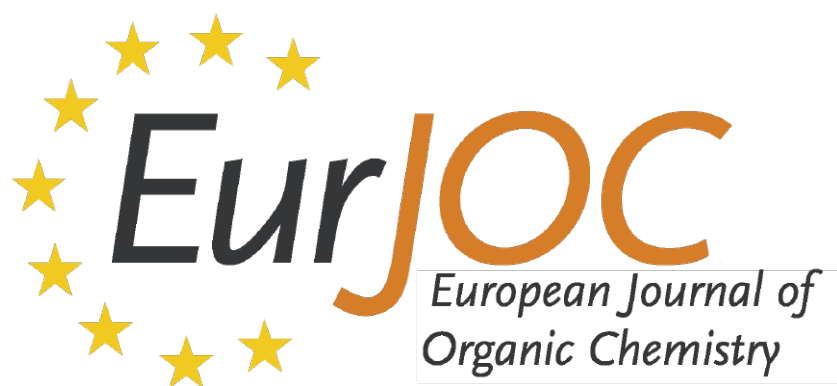

## Supporting Information

### **Cycloaddition Strategies for the Synthesis of Diverse Heterocyclic Spirocycles for Fragment-Based Drug Discovery**

Thomas A. King, Hannah L. Stewart, Kim T. Mortensen,  
Andrew J. P. North, Hannah F. Sore, and David R. Spring\*

[ejoc201900847-sup-0001-SupMat.pdf](#)

## Contents

|                                                                                                      |    |
|------------------------------------------------------------------------------------------------------|----|
| 1. Compounds Properties .....                                                                        | 2  |
| 2. NMR Spectra .....                                                                                 | 3  |
| N-hydroxybenzimidoyl chloride (12).....                                                              | 3  |
| Ethyl (tert-butoxycarbonyl)-l-serinate (15).....                                                     | 4  |
| Ethyl 2-((tert-butoxycarbonyl)amino)acrylate (1) .....                                               | 5  |
| tert-Butyl 4-(2-ethoxy-2-oxoethylidene) piperidine-1-carboxylate (5a).....                           | 6  |
| .....                                                                                                | 6  |
| tert-butyl 3-(2-ethoxy-2-oxoethylidene) azetidine-1-carboxylate (5b) .....                           | 7  |
| tert-Butyl 3-(2-ethoxy-2-oxoethylidene)pyrrolidine-1-carboxylate (5c) .....                          | 8  |
| tert-Butyl 3-(2-ethoxy-2-oxoethylidene)azepane-1-carboxylate (5e).....                               | 12 |
| Ethyl 4-((tert-butoxycarbonyl)amino)-3-phenyl-4,5-dihydroisoxazole-4-carboxylate (2)<br>.....        | 13 |
| tert-Butyl (4-(hydroxymethyl)-3-phenyl-4,5-dihydroisoxazol-4-yl)carbamate (2') .....                 | 14 |
| 3-Phenyl-1,8-dioxa-2,6-diazaspiro[4.4]non-2-en-7-one (3) .....                                       | 15 |
| 8-(tert-Butyl) 4-ethyl 3-phenyl-1-oxa-2,8-diazaspiro[4.5]dec-2-ene-4,8-dicarboxylate<br>(7a).....    | 16 |
| 2-(tert-Butyl) 8-ethyl 7-phenyl-5-oxa-2,6-diazaspiro[3.4]oct-6-ene-2,8-dicarboxylate<br>(7b).....    | 17 |
| 7-(tert-Butyl) 4-ethyl 3-phenyl-1-oxa-2,7-diazaspiro[4.4]non-2-ene-4,7-dicarboxylate<br>(7c).....    | 18 |
| 7-(tert-Butyl) 4-ethyl 3-phenyl-1-oxa-2,7-diazaspiro[4.5]dec-2-ene-4,7-dicarboxylate<br>(7d).....    | 19 |
| 7-(tert-Butyl) 4-ethyl 3-phenyl-1-oxa-2,7-diazaspiro[4.6]undec-2-ene-4,7-dicarboxylate<br>(7e).....  | 20 |
| Ethyl 3-phenyl-1-oxa-2,8-diazaspiro[4.5]dec-2-ene-4-carboxylate (17a).....                           | 21 |
| 2-(tert-Butyl) 8-ethyl 7-benzyl-2,5,6,7-tetraazaspiro[3.4]oct-5-ene-2,8-dicarboxylate (8)<br>.....   | 22 |
| tert-Butyl 3-oxo-1,2,8-triazaspiro[4.5]decane-8-carboxylate (9) .....                                | 23 |
| tert-Butyl 4-((4-methoxyphenyl)imino)piperidine-1-carboxylate (6).....                               | 24 |
| tert-Butyl 3-acetoxy-1-(4-methoxyphenyl)-2-oxo-1,7-diazaspiro[3.5]nonane-7-<br>carboxylate (10)..... | 25 |
| 3. X-ray Crystallography .....                                                                       | 26 |
| 3-Phenyl-1,8-dioxa-2,6-diazaspiro[4.4]non-2-en-7-one (3) .....                                       | 26 |

## 1. Compounds Properties

Calculated using Data Warrior

| Compound                                                                            | MW         | cLogP        | HAC         | HBA        | HBD        | pTSA        | Shape Index  | Molecular Complexity | Chiral Centres | RBC        | sp <sup>3</sup> -Atom |
|-------------------------------------------------------------------------------------|------------|--------------|-------------|------------|------------|-------------|--------------|----------------------|----------------|------------|-----------------------|
| 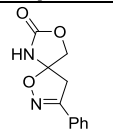   | 218        | 1.98         | 16          | 5          | 1          | 59.9        | 0.625        | 0.755                | 1              | 1          | 5                     |
|    | 288        | 2.48         | 21          | 5          | 1          | 59.9        | 0.476        | 0.824                | 1              | 4          | 11                    |
|    | 260        | 1.80         | 19          | 5          | 1          | 59.9        | 0.526        | 0.809                | 1              | 4          | 9                     |
|    | 274        | 2.40         | 20          | 5          | 1          | 59.9        | 0.500        | 0.838                | 2              | 4          | 10                    |
|    | 288        | 2.48         | 21          | 5          | 1          | 59.9        | 0.476        | 0.864                | 2              | 4          | 11                    |
|   | 302        | 2.83         | 22          | 5          | 1          | 59.9        | 0.455        | 0.868                | 2              | 4          | 12                    |
|  | 184        | -1.43        | 13          | 6          | 2          | 75.1        | 0.615        | 0.680                | 1              | 3          | 8                     |
|  | 155        | -1.76        | 11          | 4          | 3          | 53.2        | 0.636        | 0.645                | 0              | 0          | 8                     |
|  | 198        | -0.83        | 14          | 5          | 2          | 67.4        | 0.571        | 0.699                | 1              | 2          | 9                     |
|  | 156        | -1.31        | 11          | 4          | 3          | 61.4        | 0.636        | 0.685                | 1              | 0          | 8                     |
| <b>Average</b>                                                                      | <b>232</b> | <b>0.866</b> | <b>16.8</b> | <b>4.9</b> | <b>1.6</b> | <b>61.6</b> | <b>0.552</b> | <b>0.767</b>         | <b>1.2</b>     | <b>2.6</b> | <b>9.1</b>            |

MW = molecular weight,

PSA = polar surface area,

HBA = number of hydrogen-bond acceptors,

HBD = number of hydrogen-bond donors,

HAC = heavy atom count,

RBC = rotatable bond count.

## 2. NMR Spectra

### *N*-hydroxybenzimidoyl chloride (12)

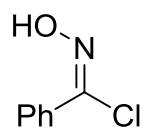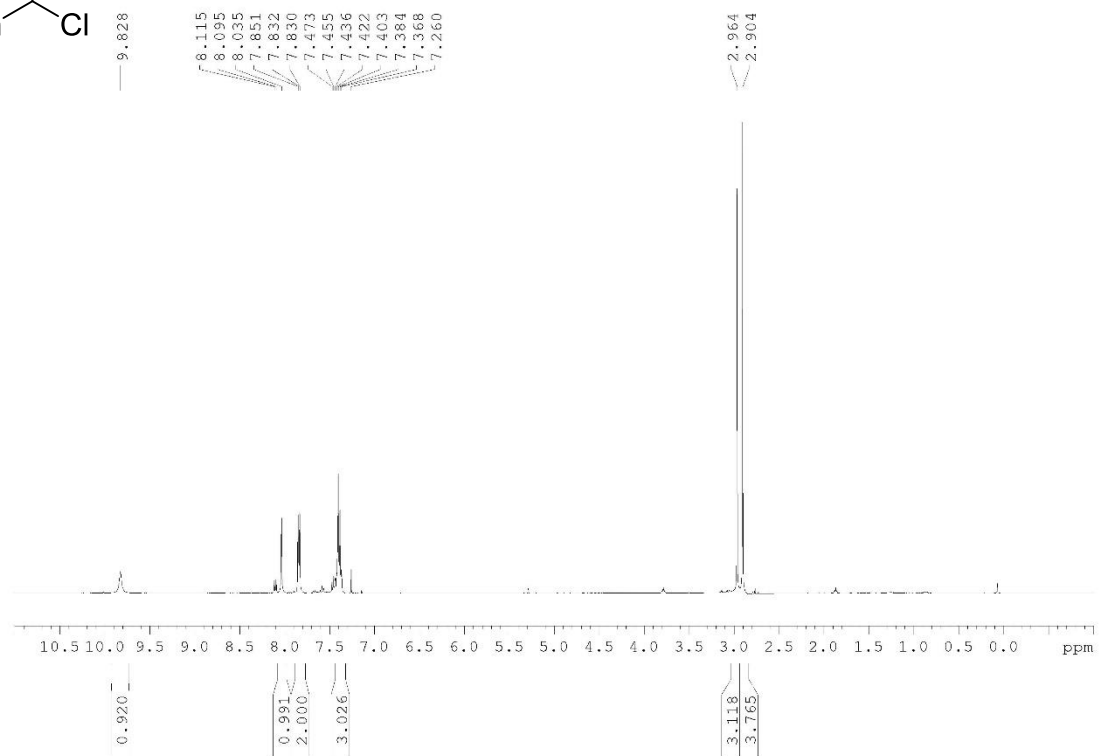

# Ethyl (tert-butoxycarbonyl)-l-serinate (15)

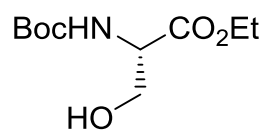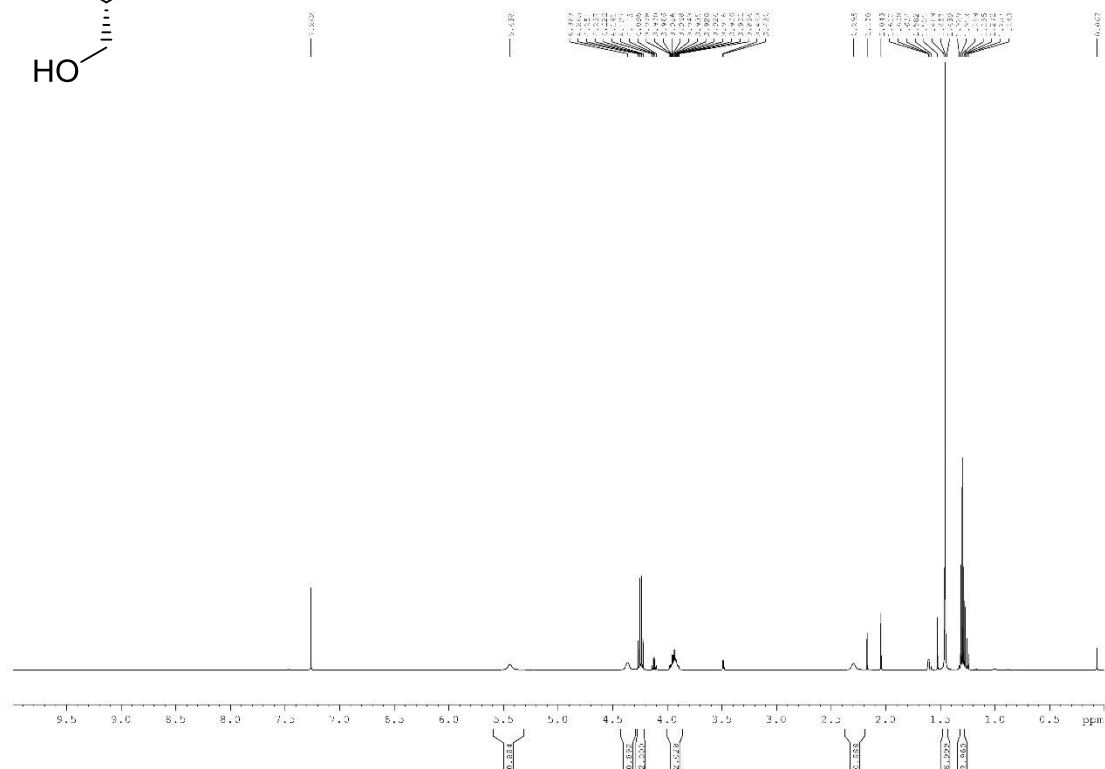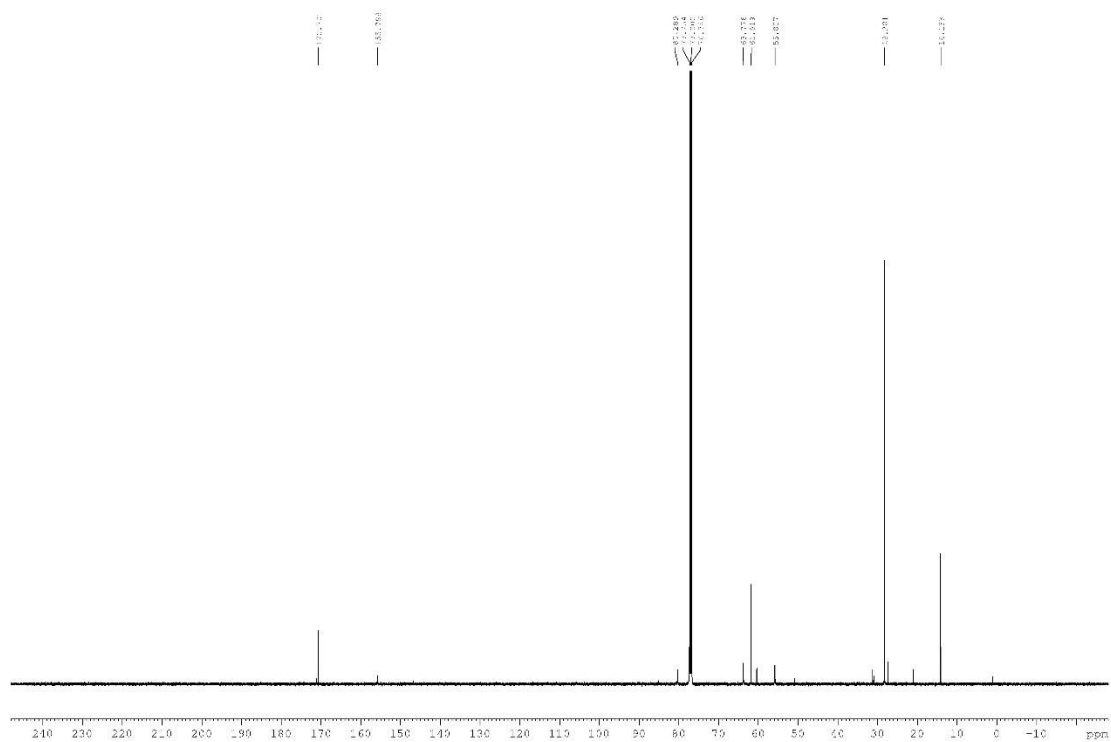

# Ethyl 2-((tert-butoxycarbonyl)amino)acrylate (1)

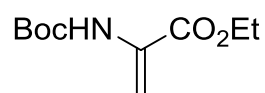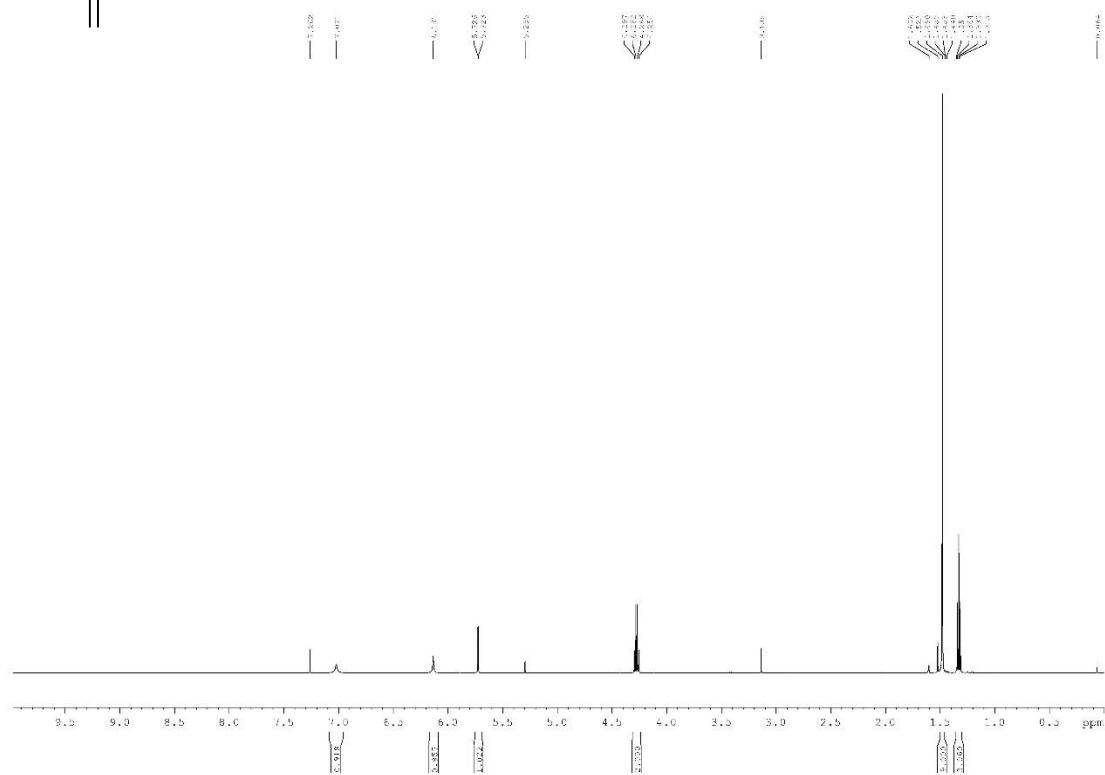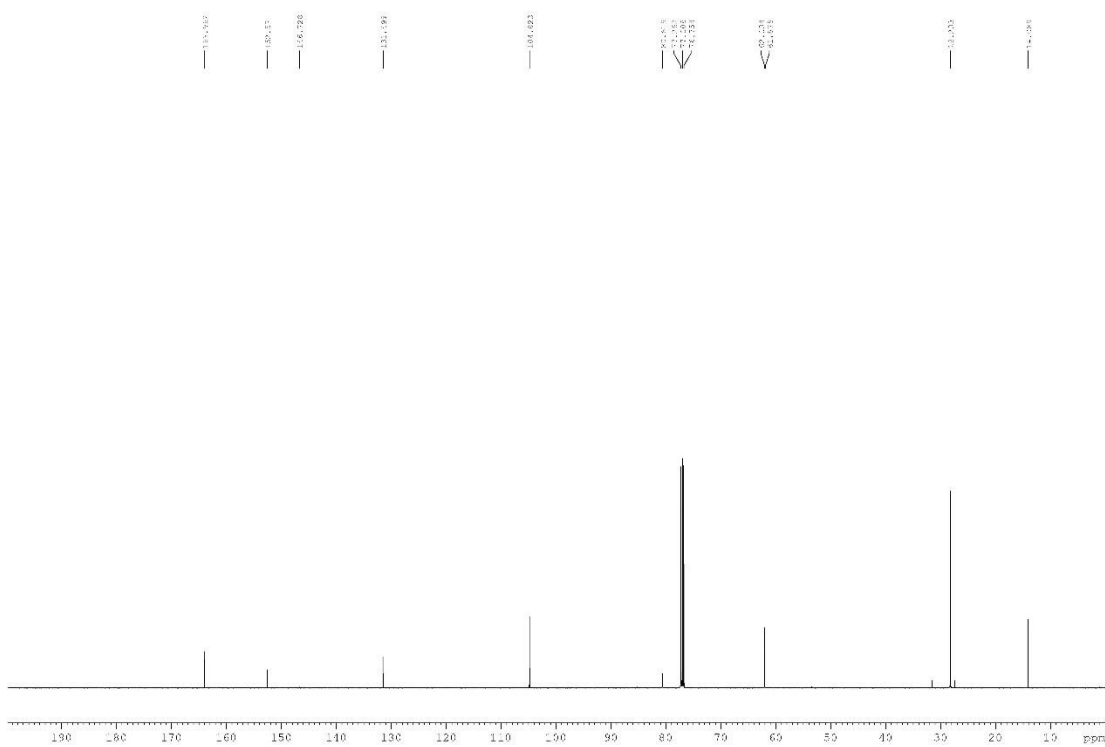

**tert-Butyl 4-(2-ethoxy-2-oxoethylidene) piperidine-1-carboxylate (5a)**

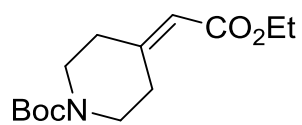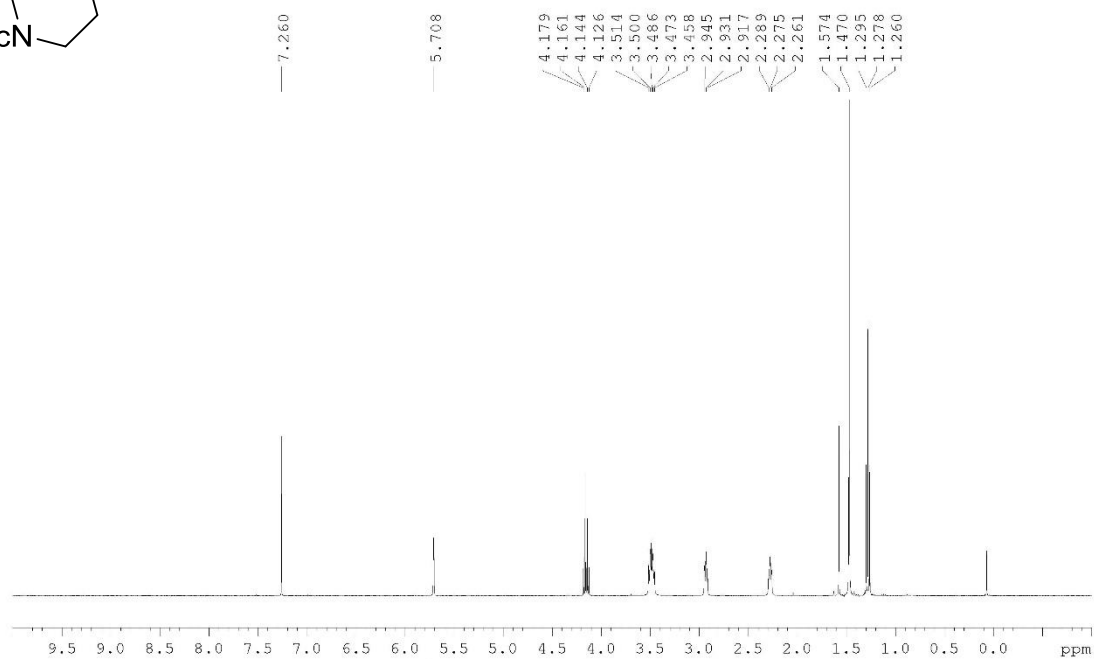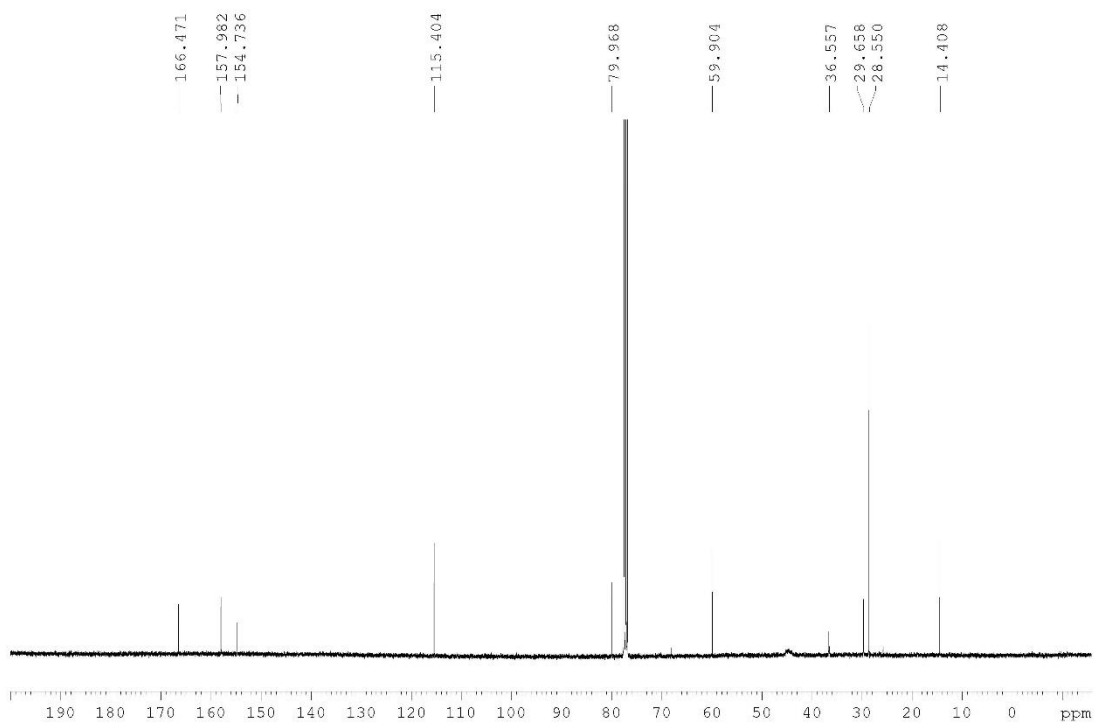

**tert-butyl 3-(2-ethoxy-2-oxoethylidene) azetidine-1-carboxylate (5b)**

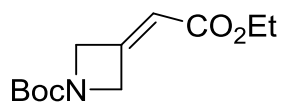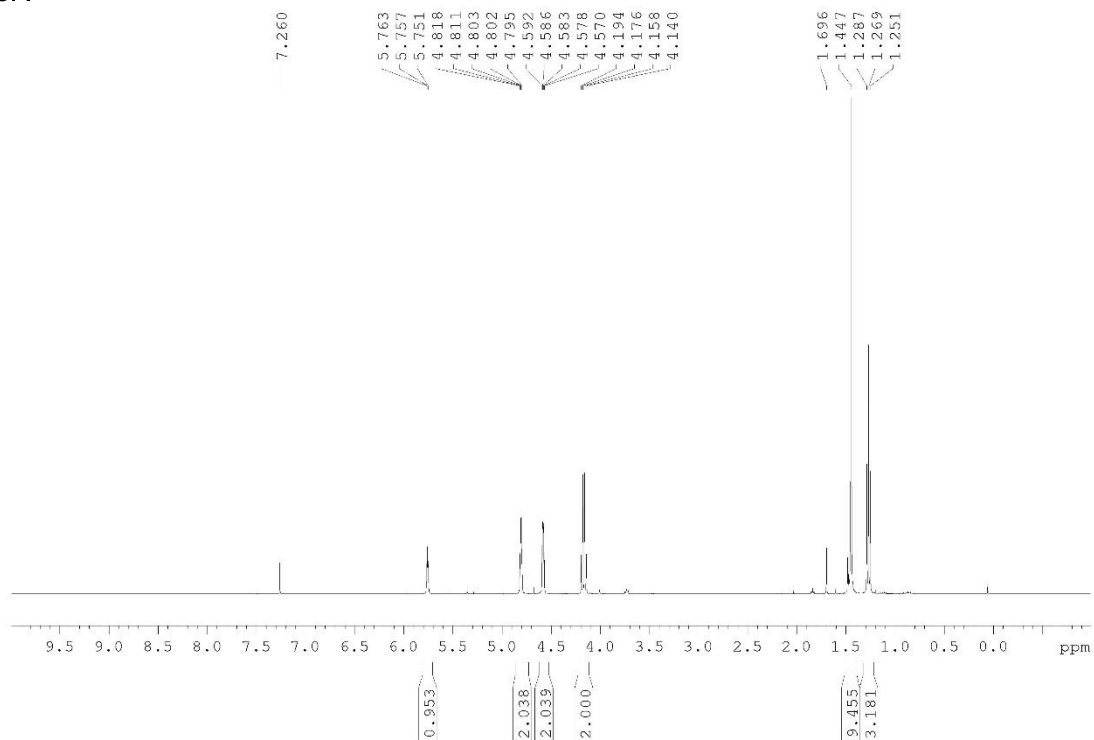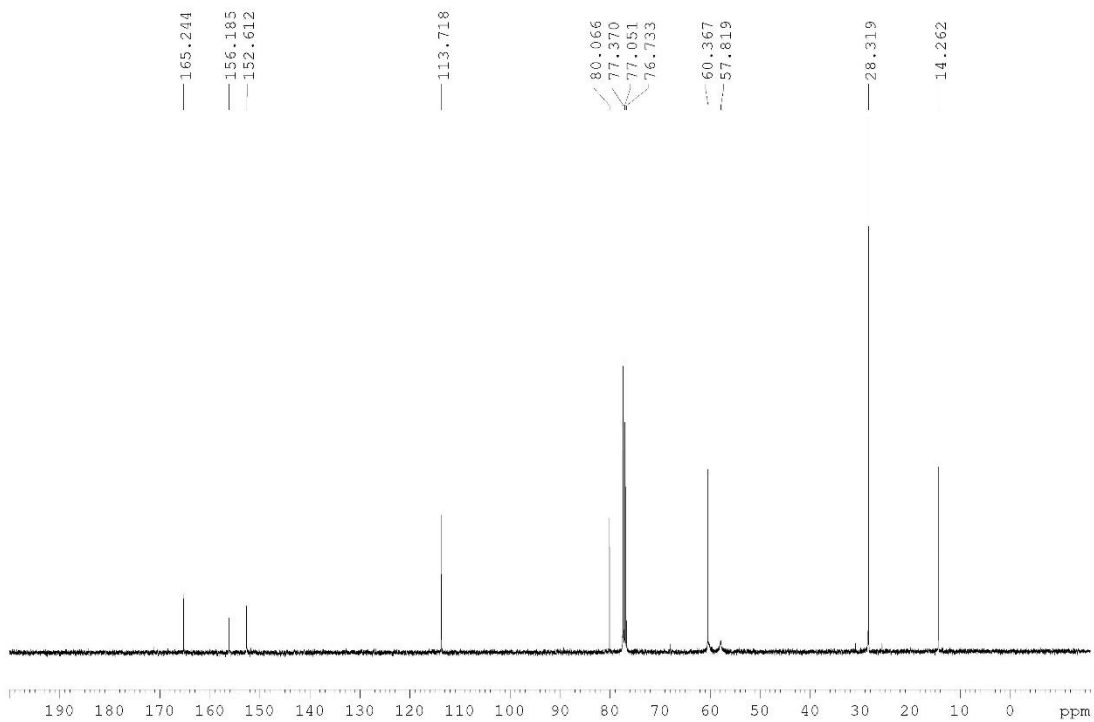



**tert-Butyl 3-(2-ethoxy-2-oxoethylidene)pyrrolidine-1-carboxylate (5c)**

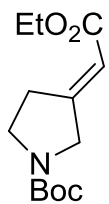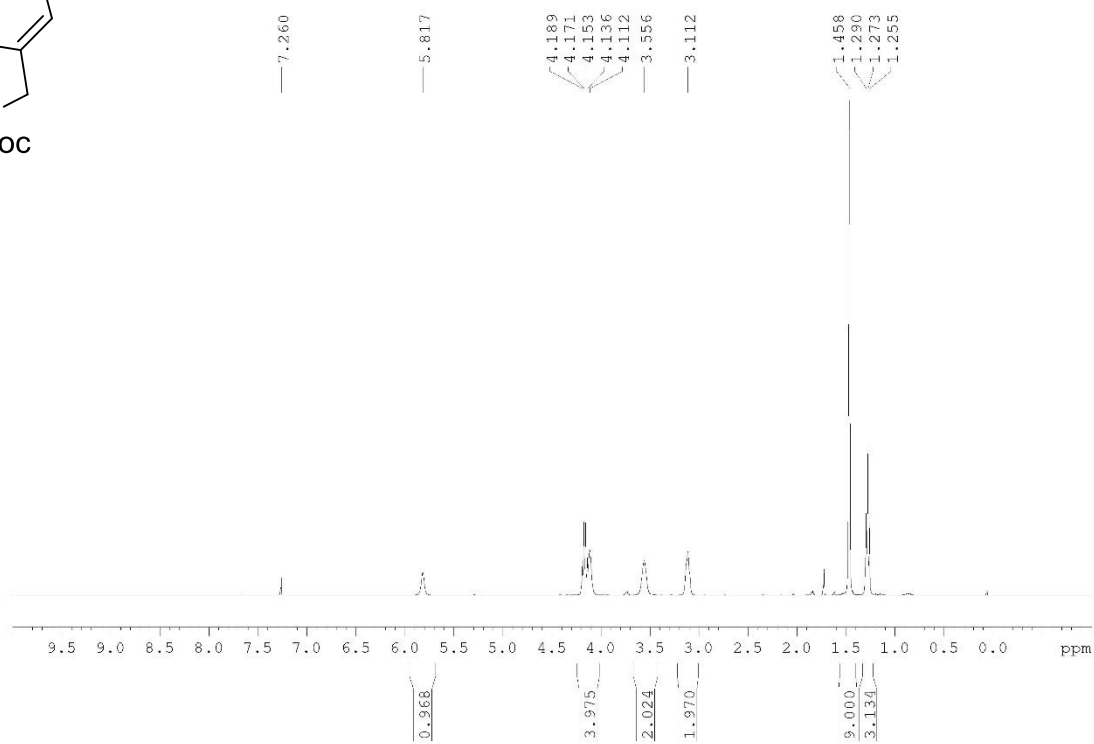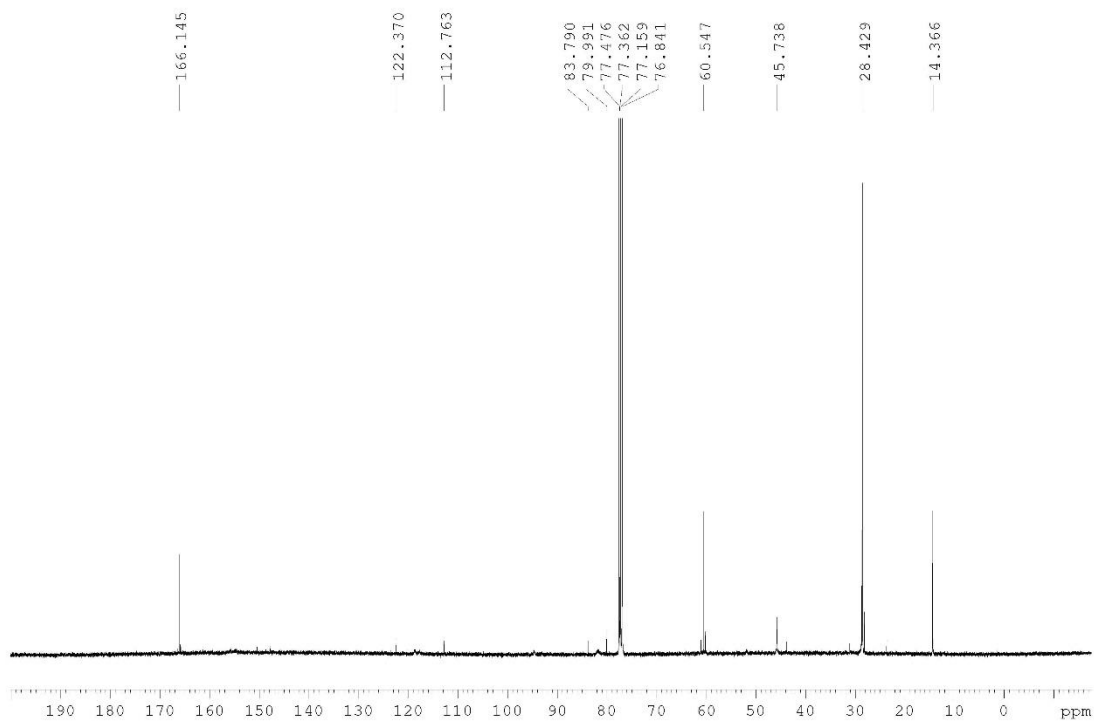

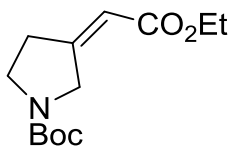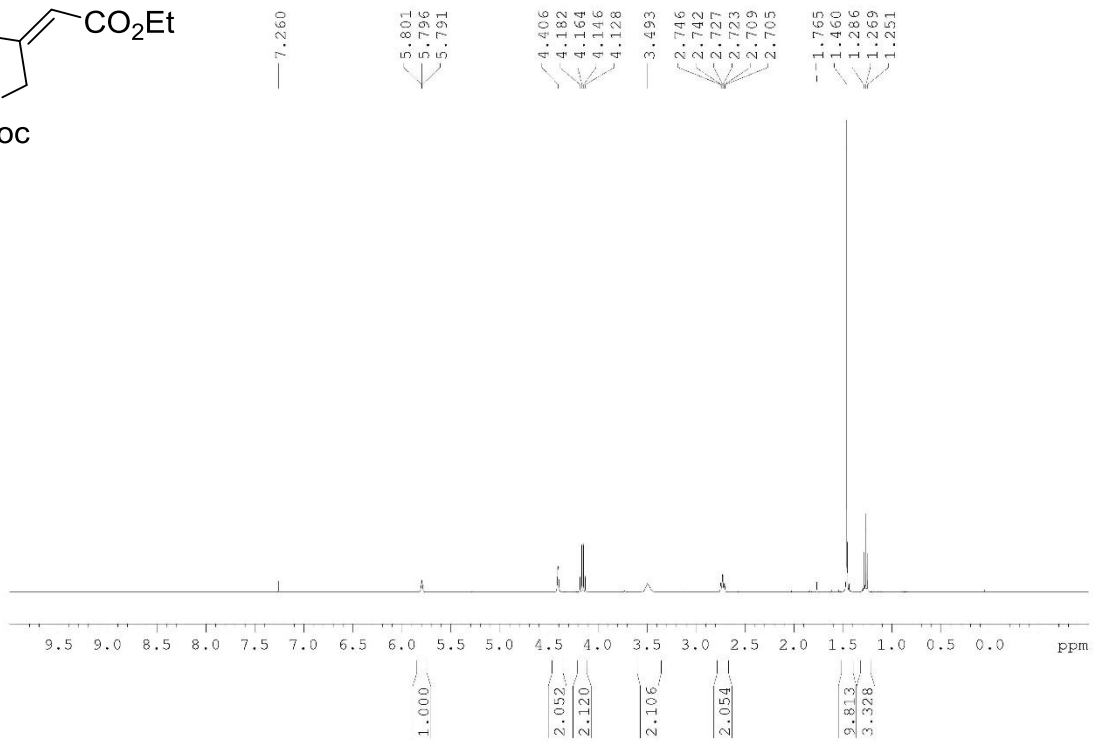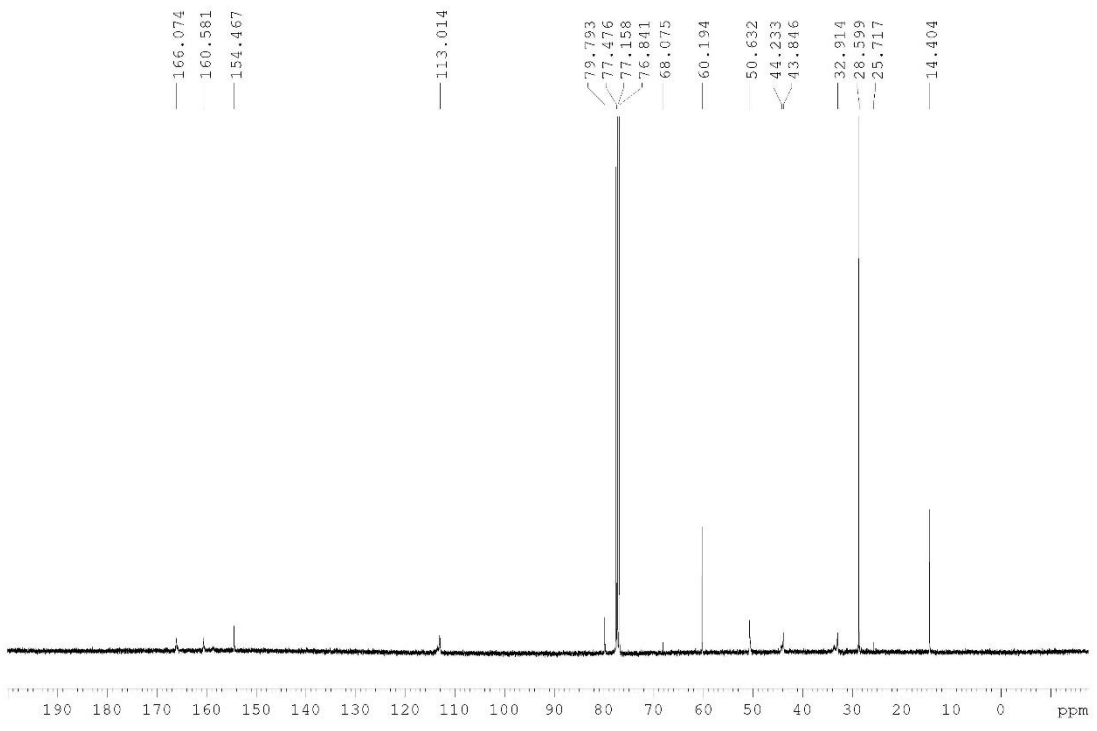

**tert-Butyl 3-(2-ethoxy-2-oxoethylidene) piperidine-1-carboxylate (5d)**

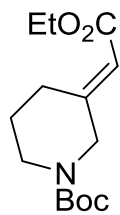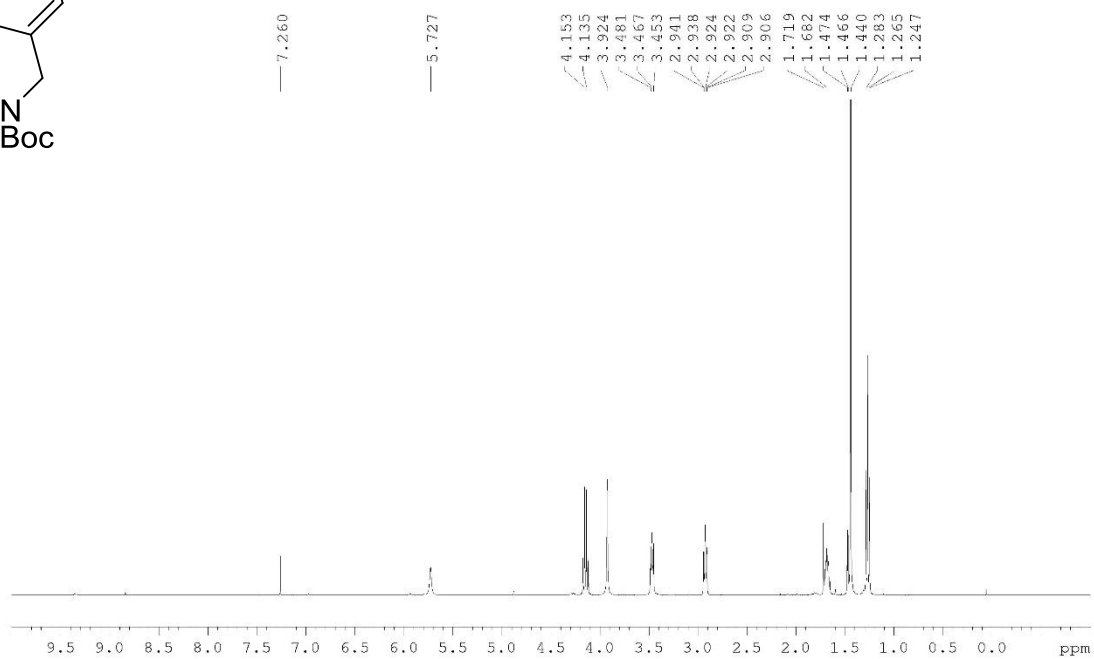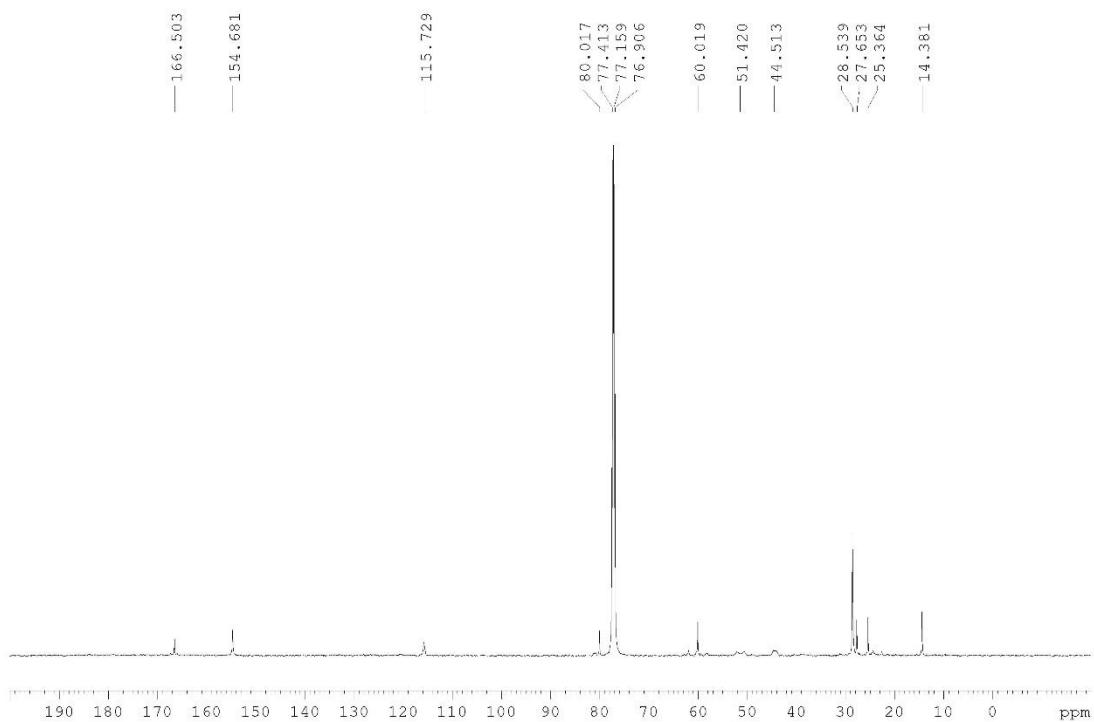

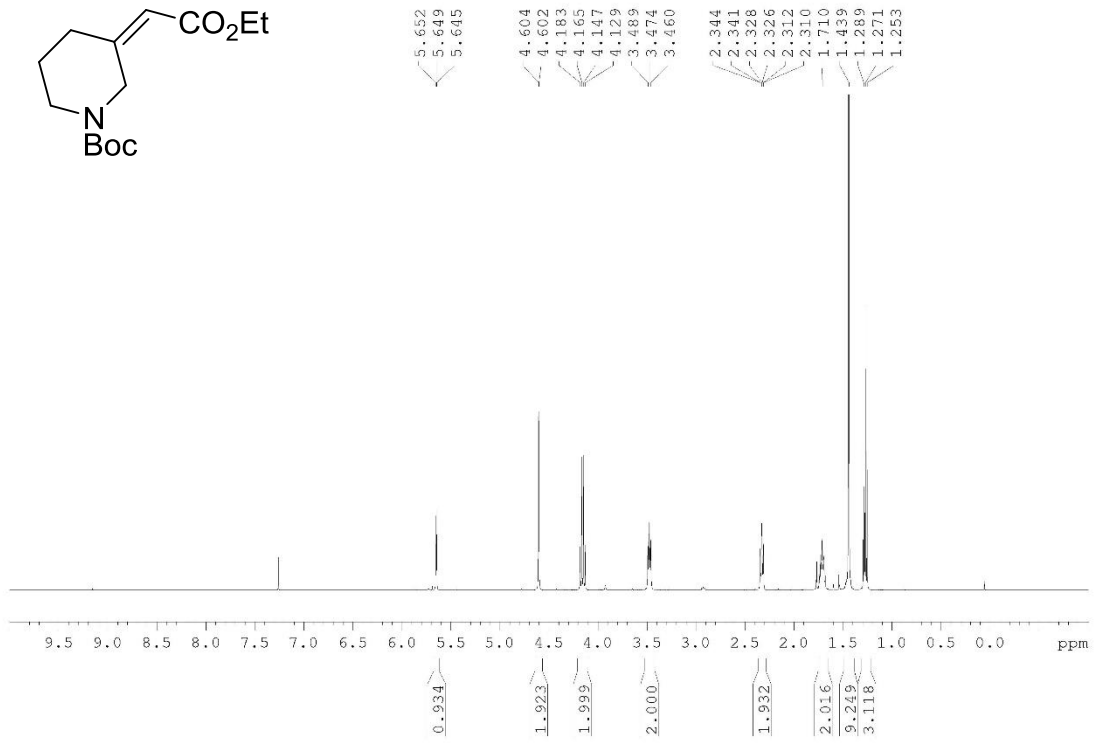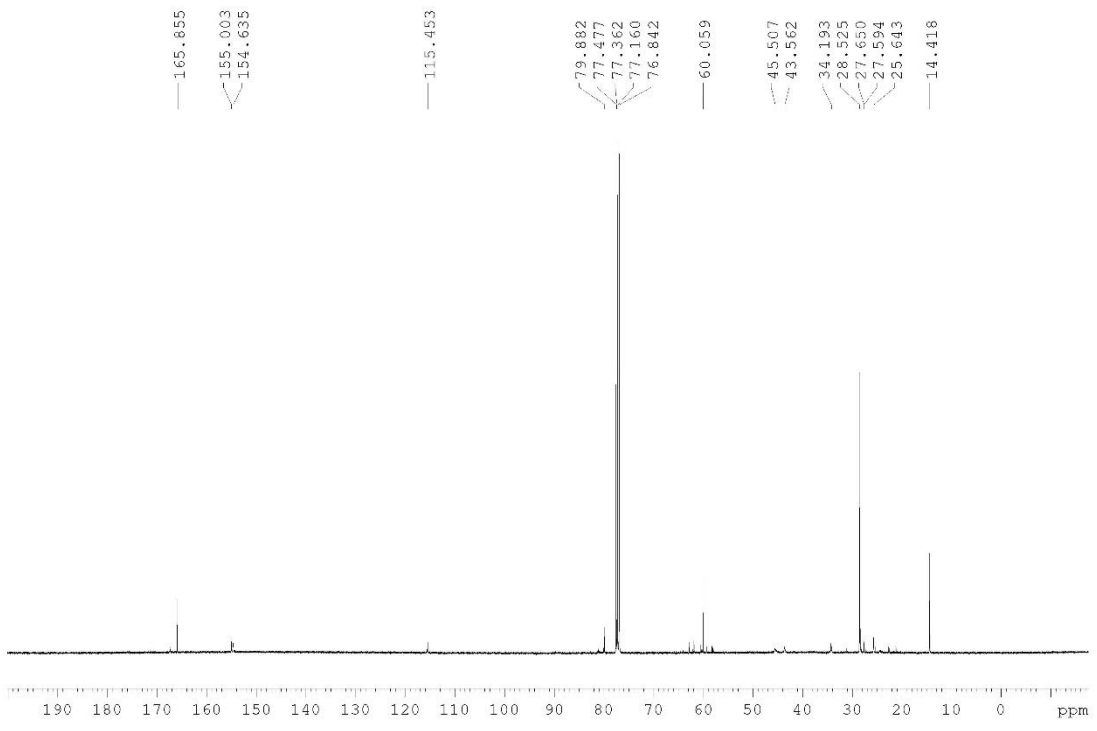

**tert-Butyl 3-(2-ethoxy-2-oxoethylidene)azepane-1-carboxylate (5e)**

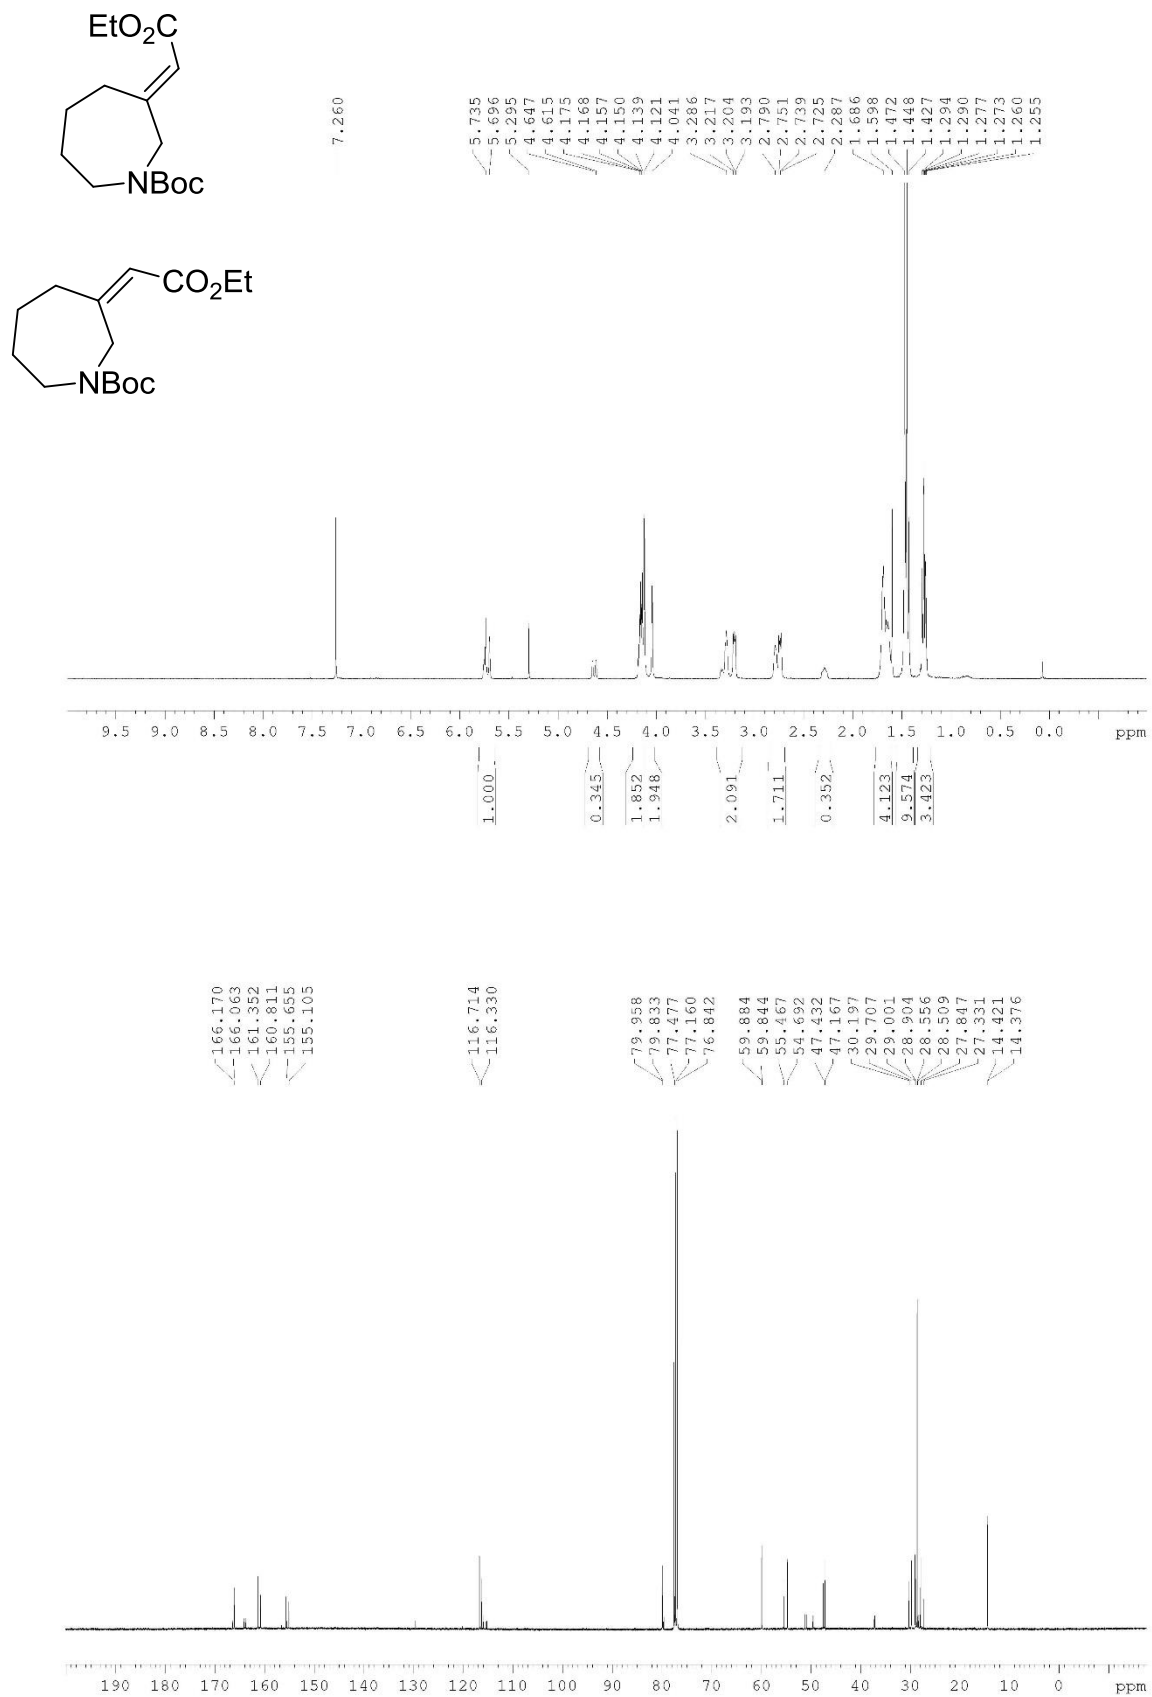

**Ethyl 4-((tert-butoxycarbonyl)amino)-3-phenyl-4,5-dihydroisoxazole-4-carboxylate (2)**

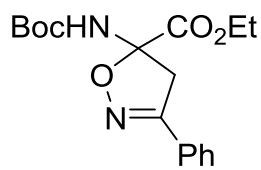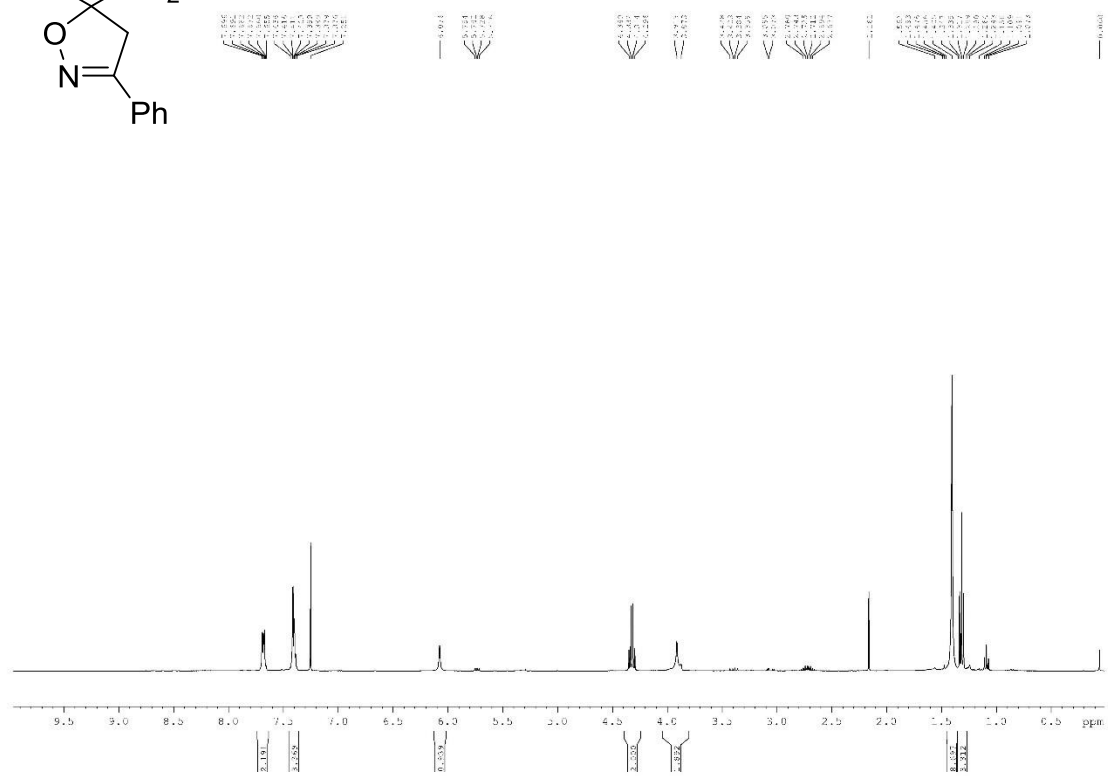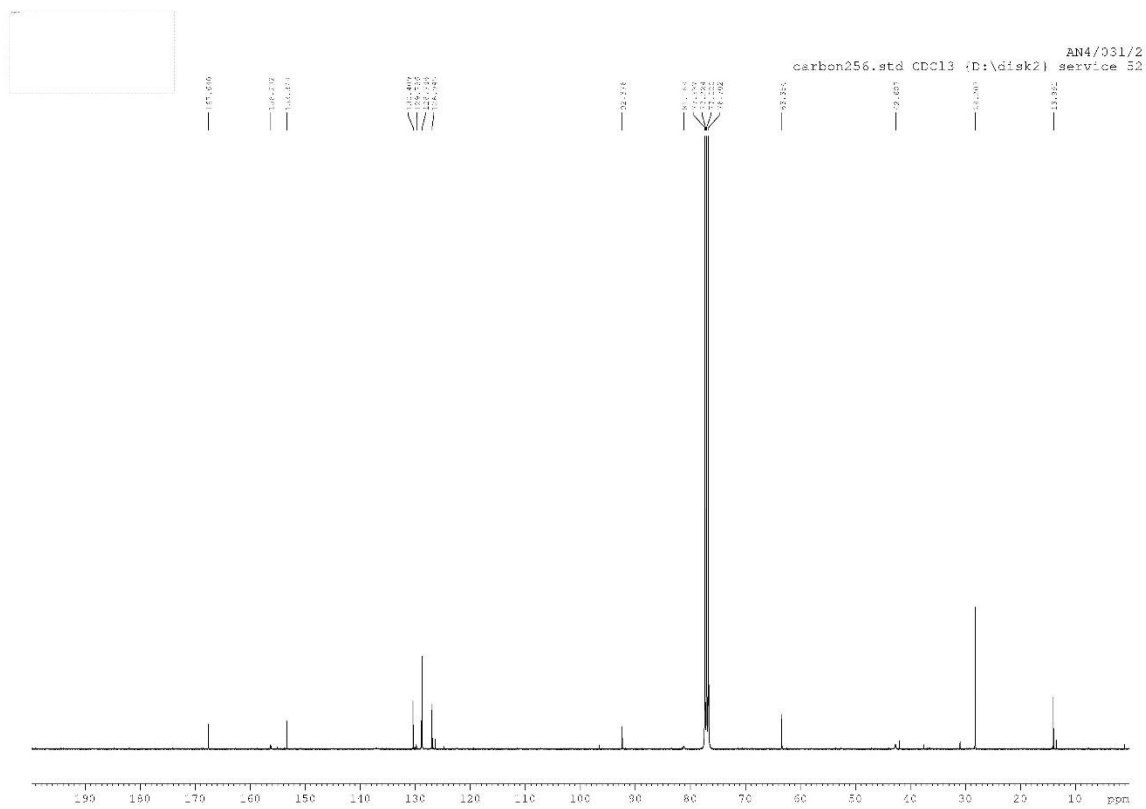

***tert*-Butyl (4-(hydroxymethyl)-3-phenyl-4,5-dihydroisoxazol-4-yl)carbamate (2')**

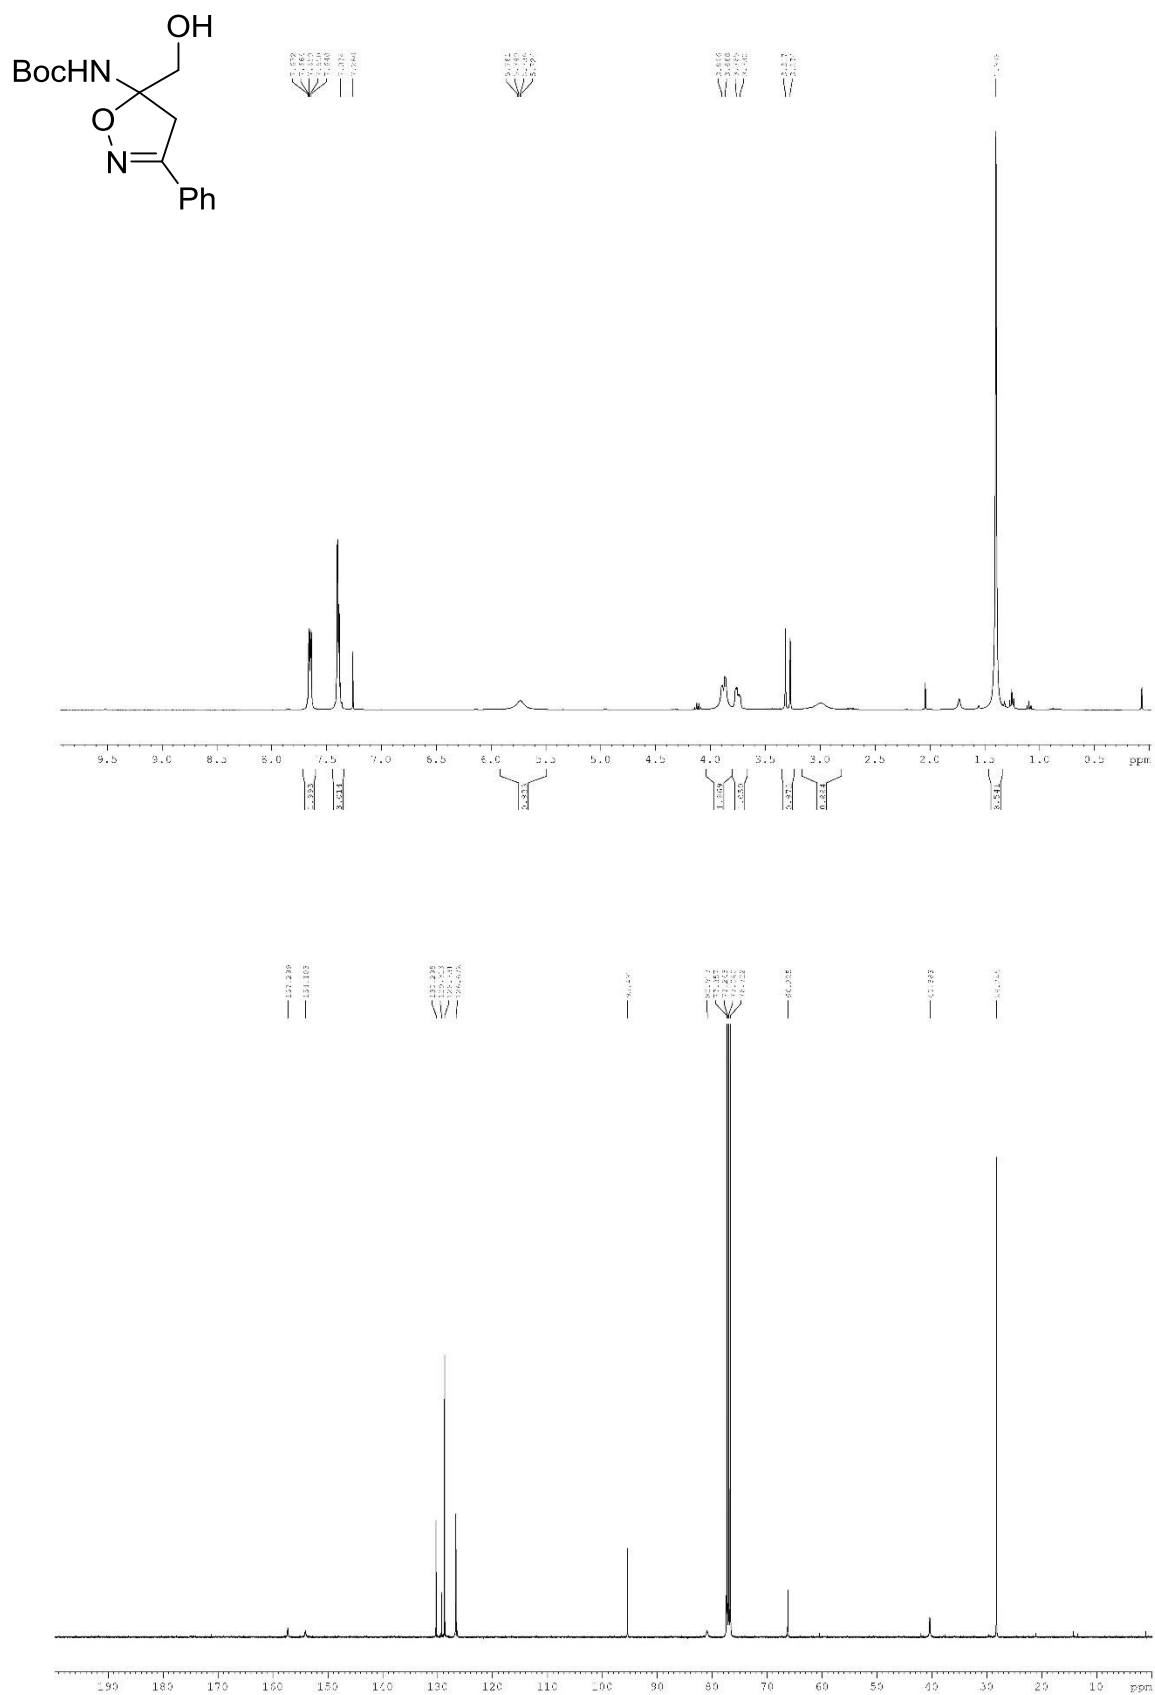

**3-Phenyl-1,8-dioxo-2,6-diazaspiro[4.4]non-2-en-7-one (3)**

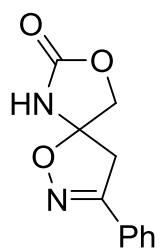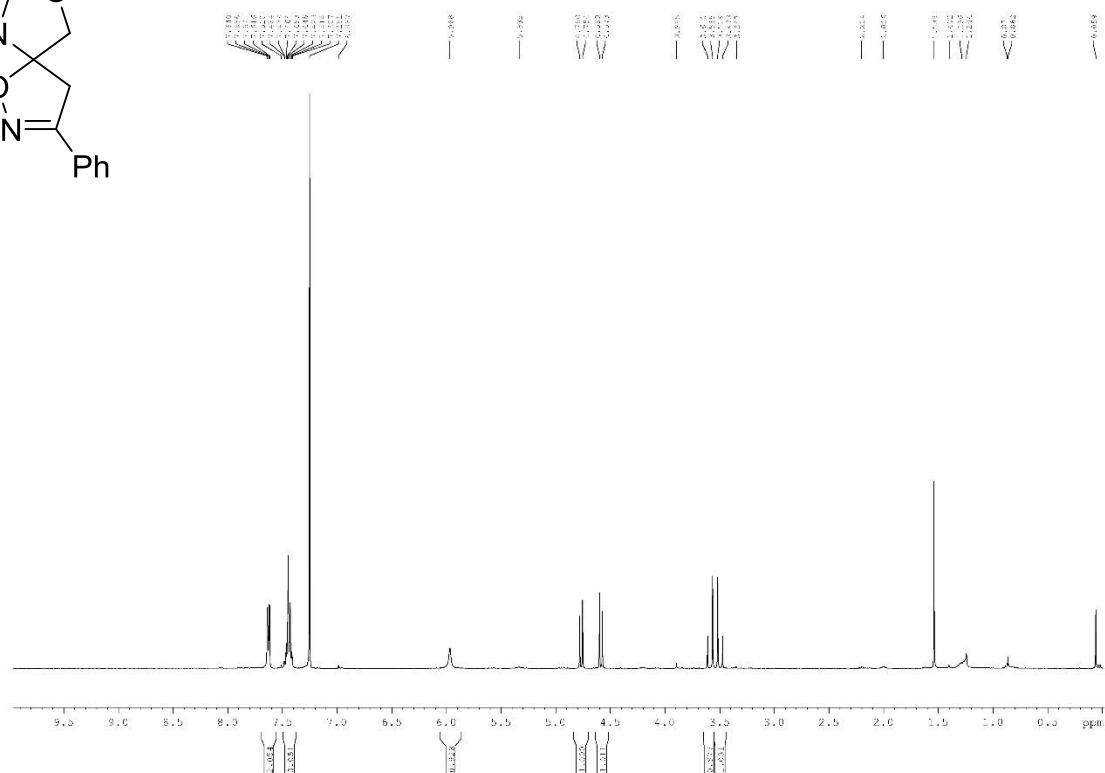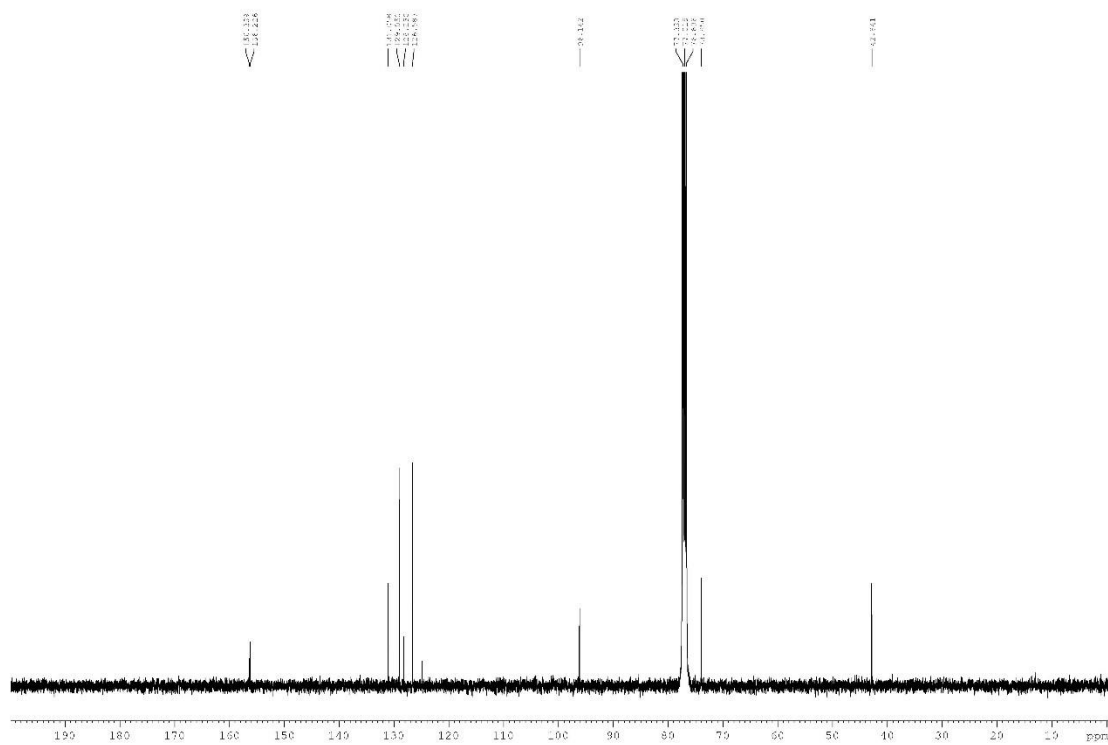



**8-(tert-Butyl) 4-ethyl 3-phenyl-1-oxa-2,8-diazaspiro[4.5]dec-2-ene-4,8-dicarboxylate (7a)**

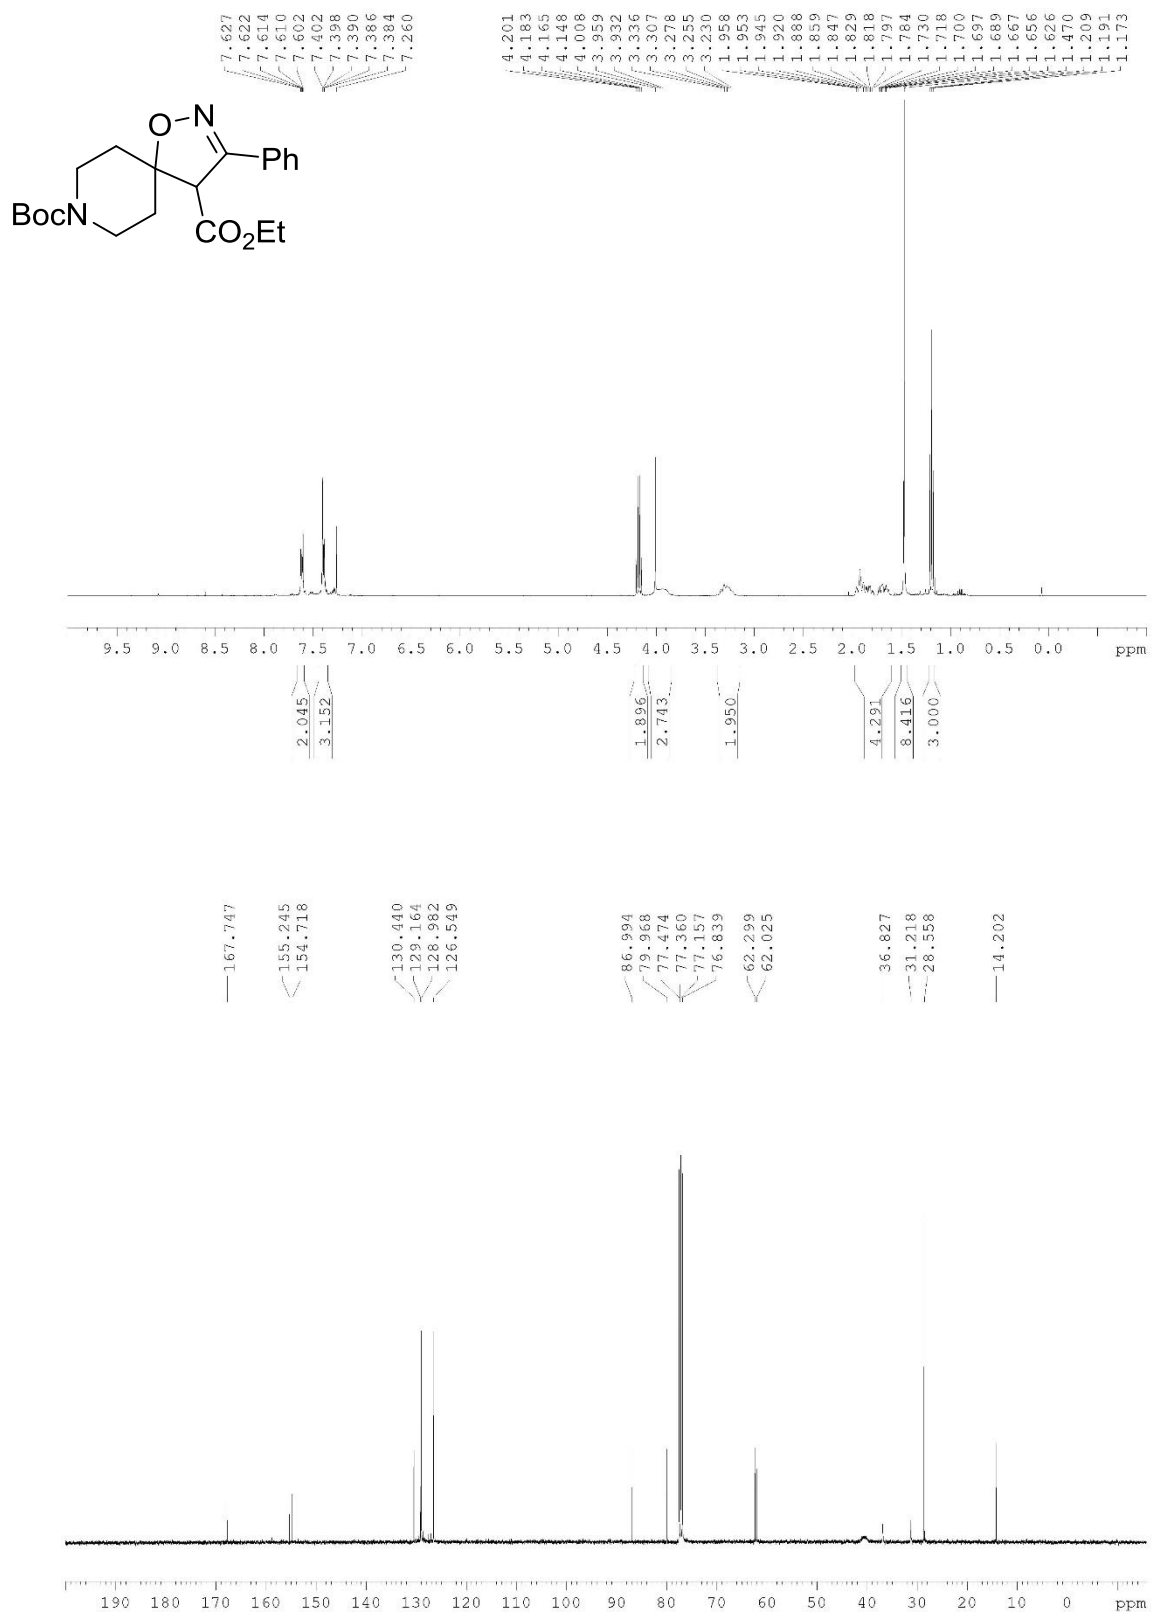

**2-(tert-Butyl) 8-ethyl 7-phenyl-5-oxa-2,6-diazaspiro[3.4]oct-6-ene-2,8-dicarboxylate (7b)**

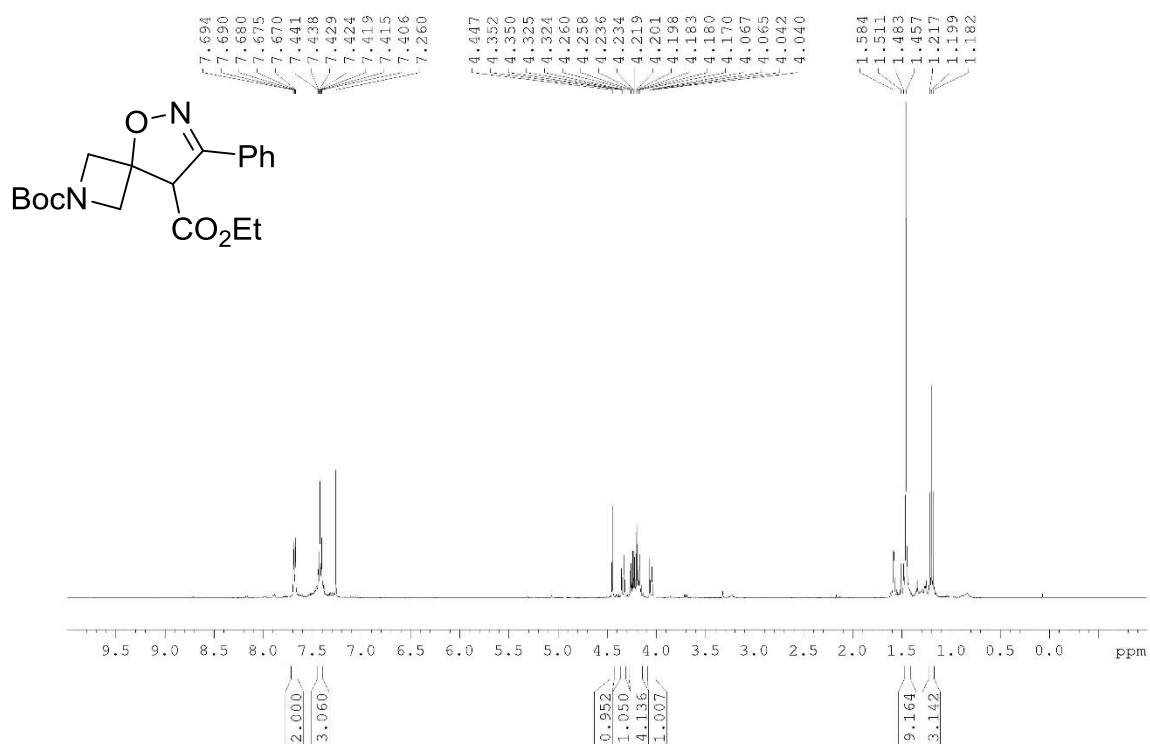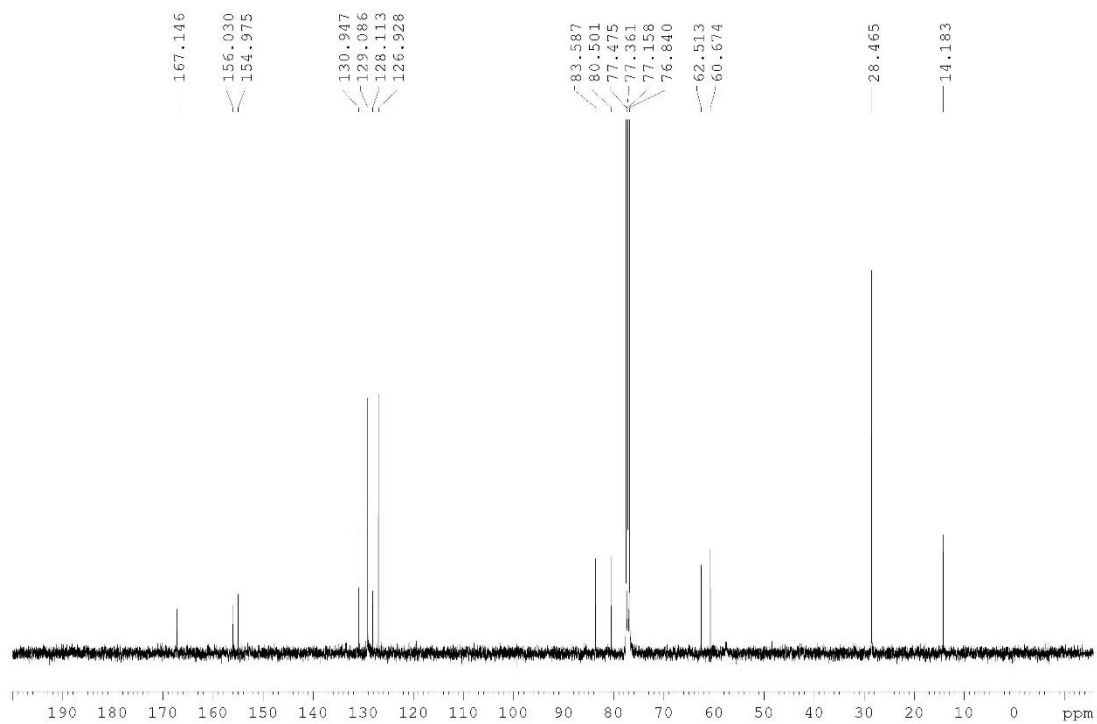

**7-(tert-Butyl) 4-ethyl 3-phenyl-1-oxa-2,7-diazaspiro[4.4]non-2-ene-4,7-dicarboxylate (7c)**

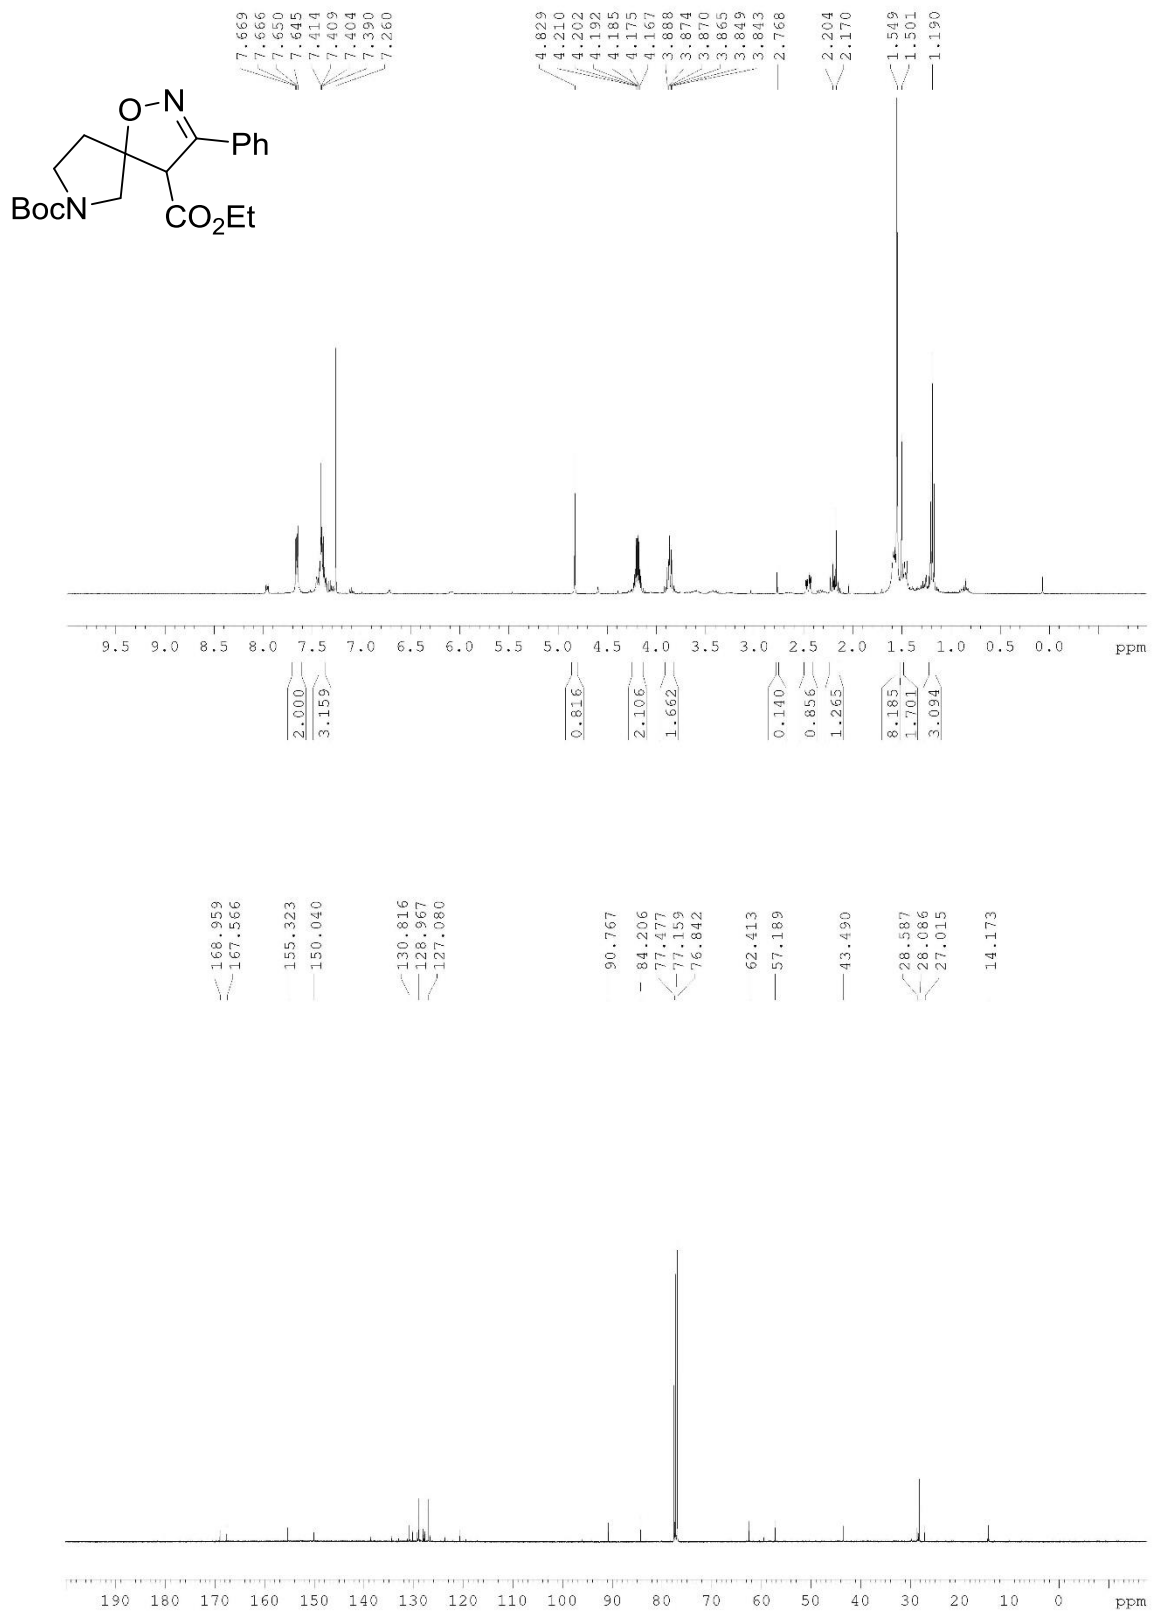

**7-(tert-Butyl) 4-ethyl 3-phenyl-1-oxa-2,7-diazaspiro[4.5]dec-2-ene-4,7-dicarboxylate (7d)**

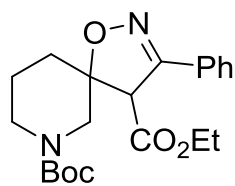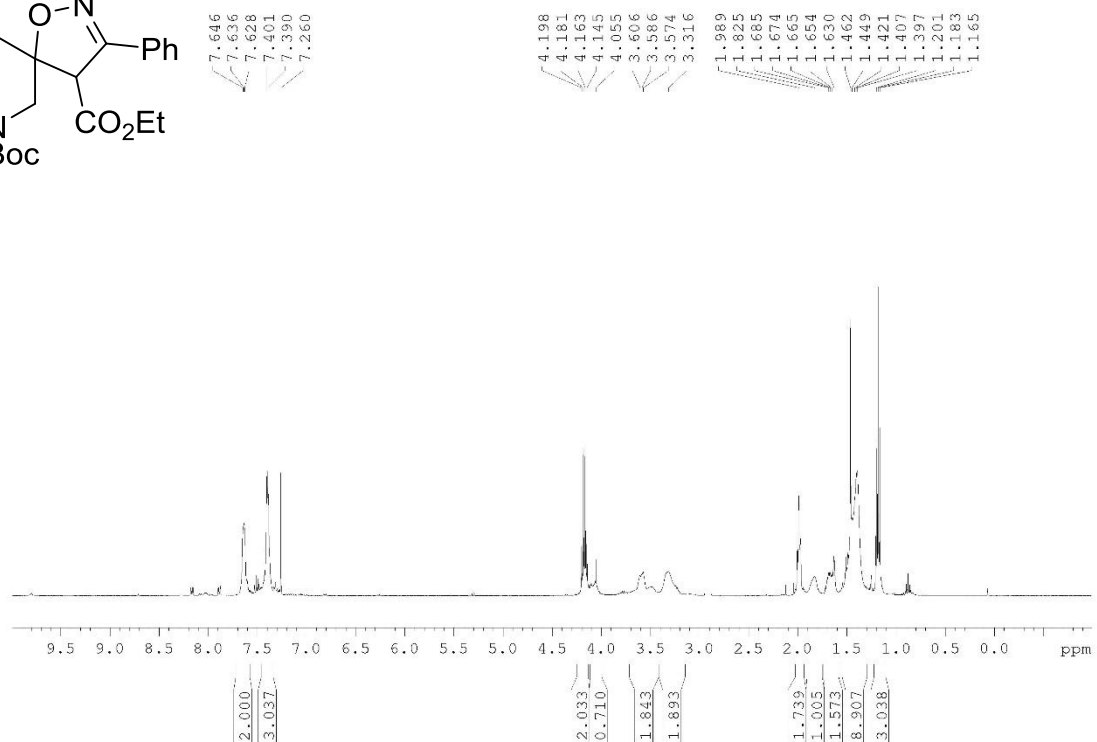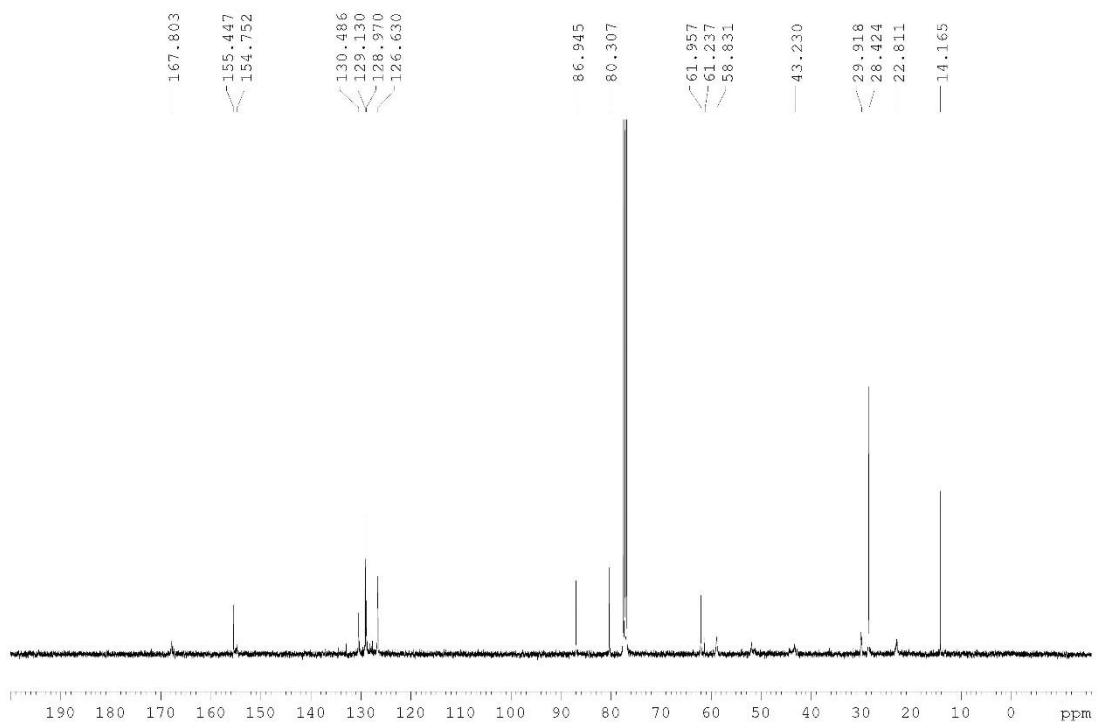

**7-(tert-Butyl) 4-ethyl 3-phenyl-1-oxa-2,7-diazaspiro[4.6]undec-2-ene-4,7-dicarboxylate (7e)**

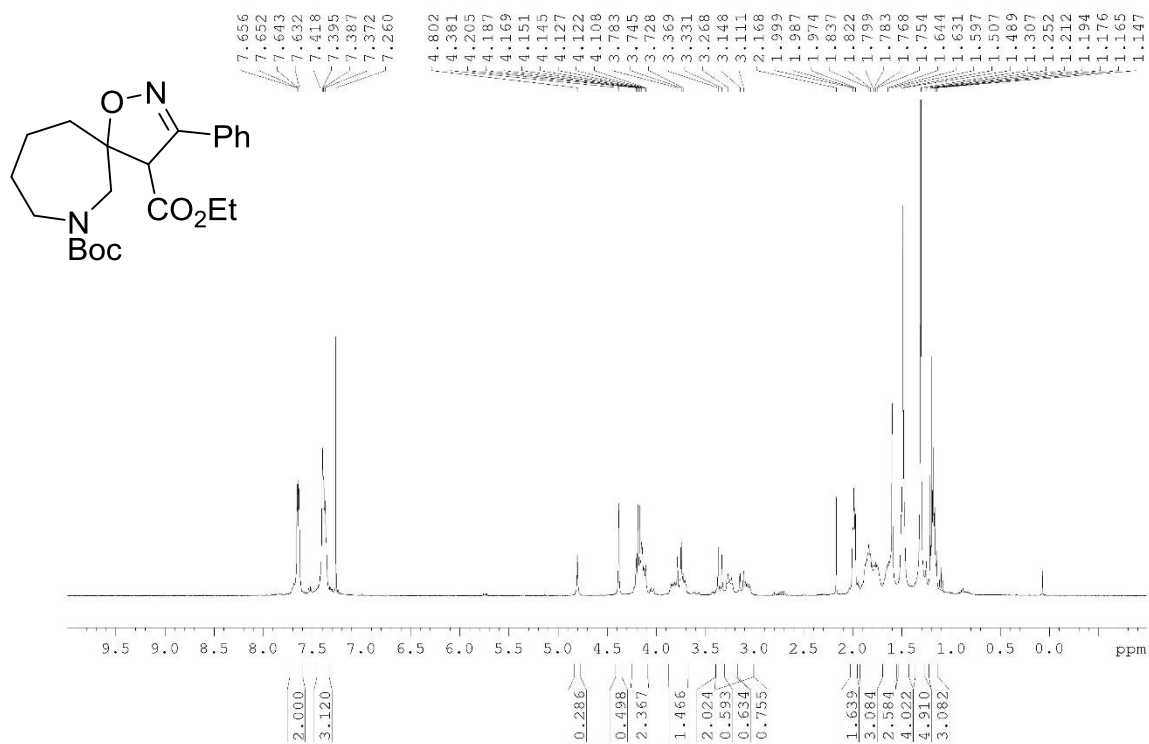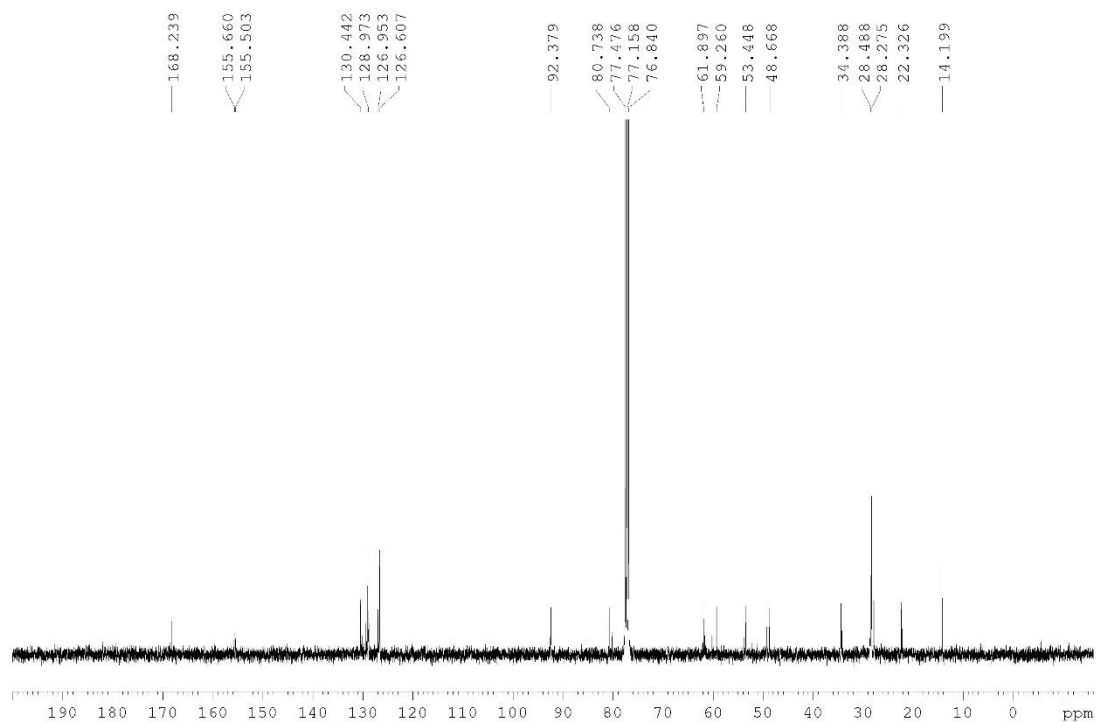

**Ethyl 3-phenyl-1-oxa-2,8-diazaspiro[4.5]dec-2-ene-4-carboxylate (17a)**

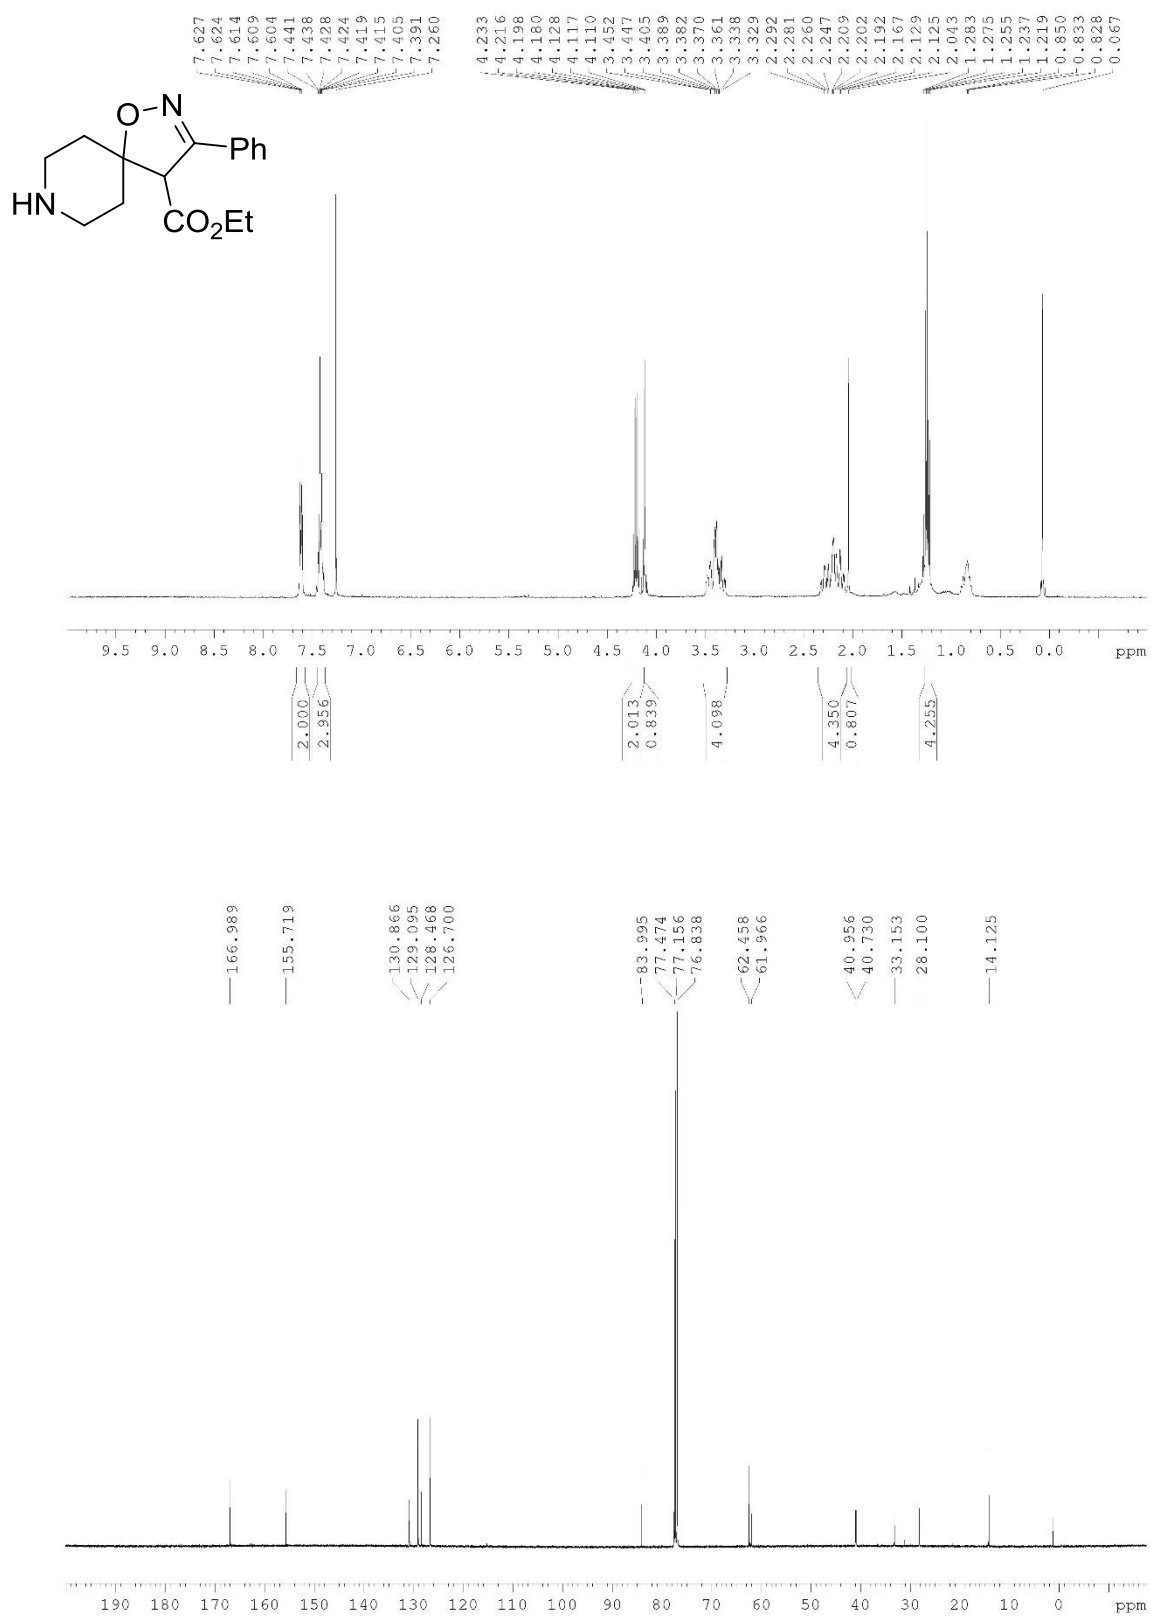

**2-(tert-Butyl) 8-ethyl 7-benzyl-2,5,6,7-tetraazaspiro[3.4]oct-5-ene-2,8-dicarboxylate (8)**

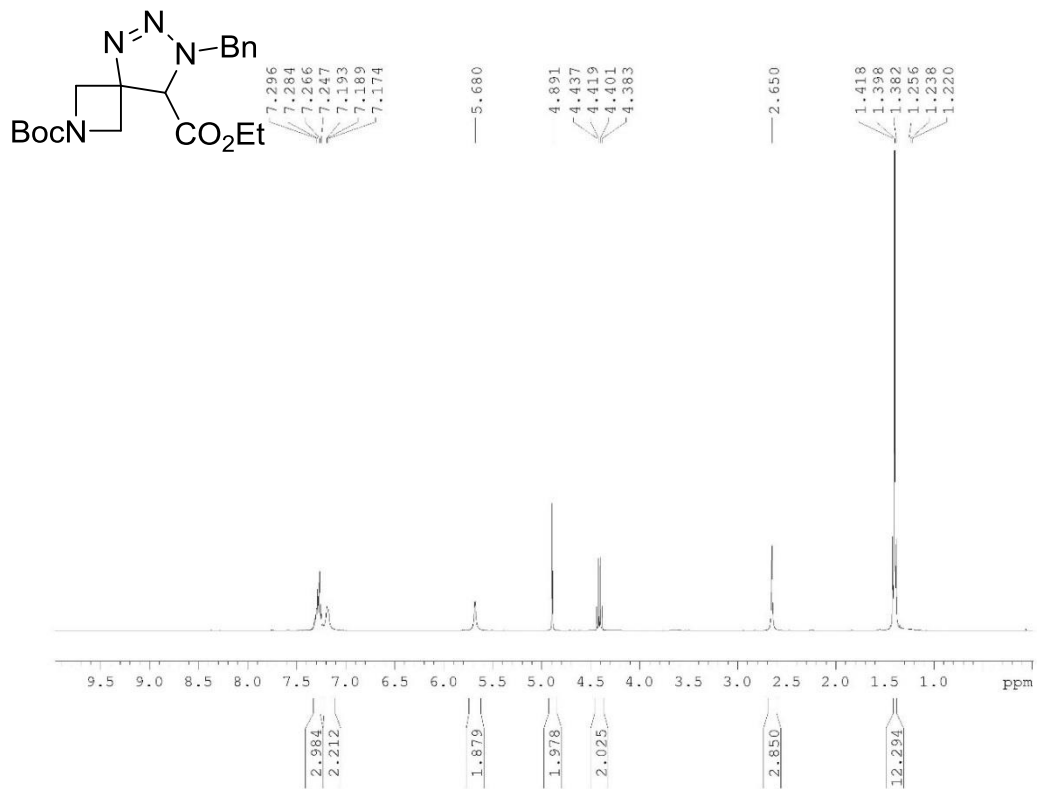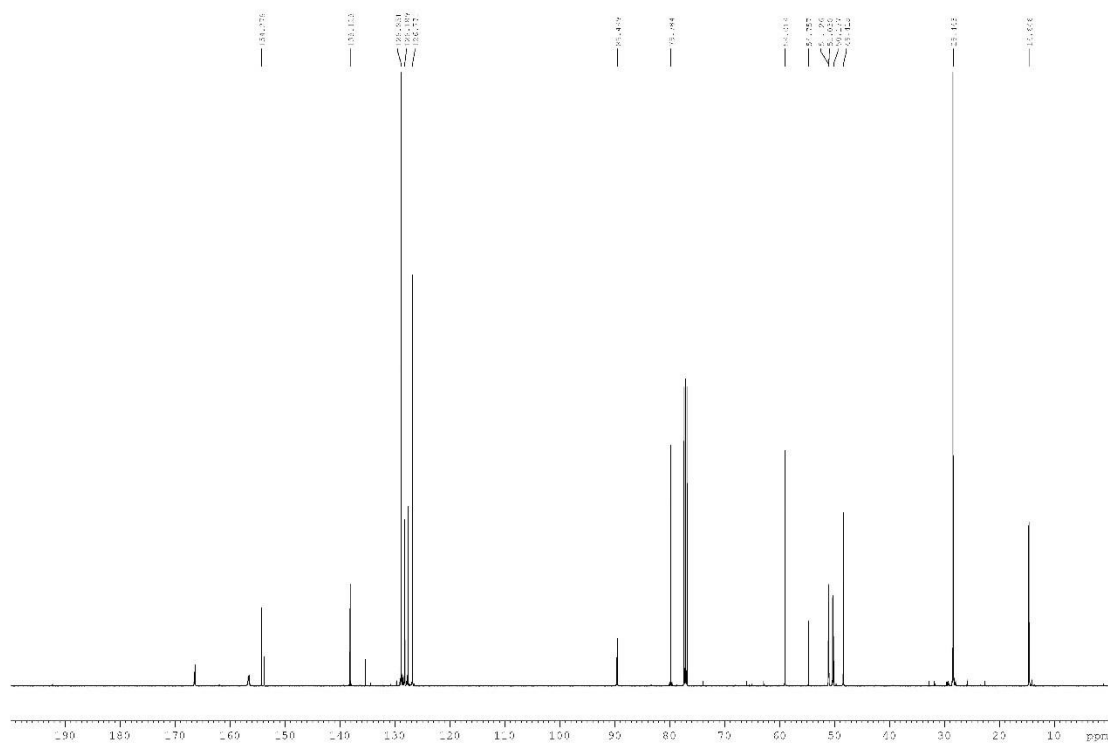

**tert-Butyl 3-oxo-1,2,8-triazaspiro[4.5]decane-8-carboxylate (9)**

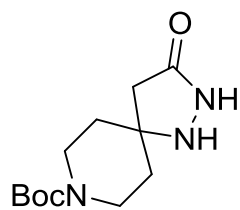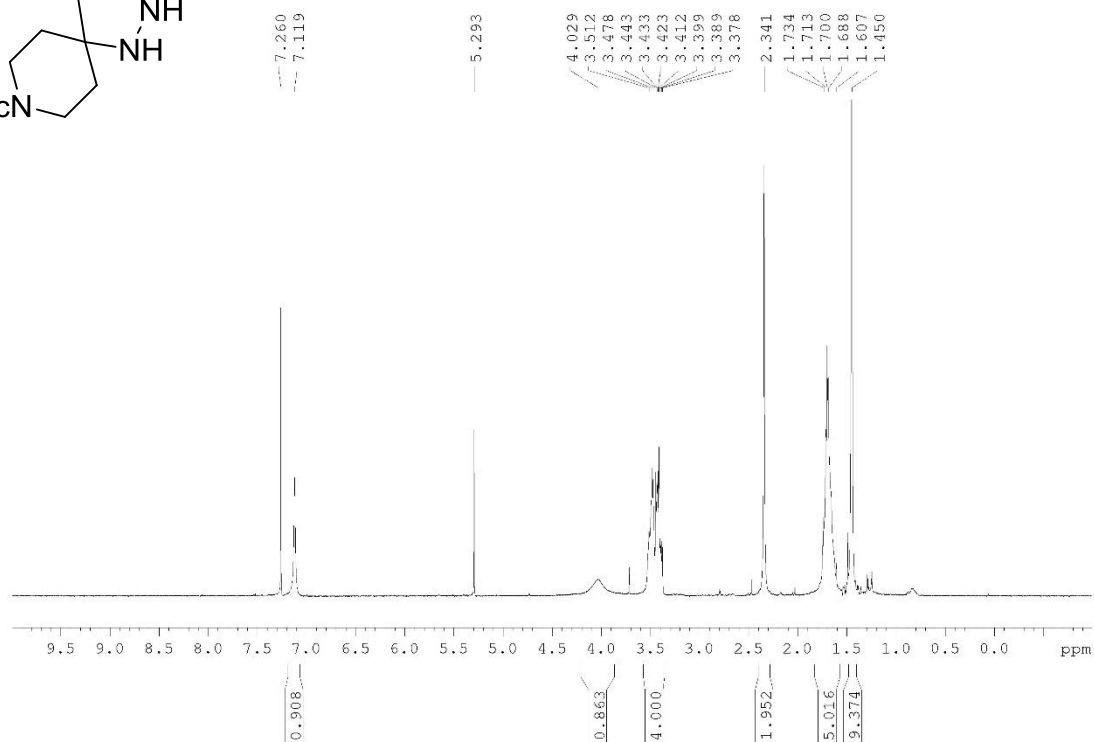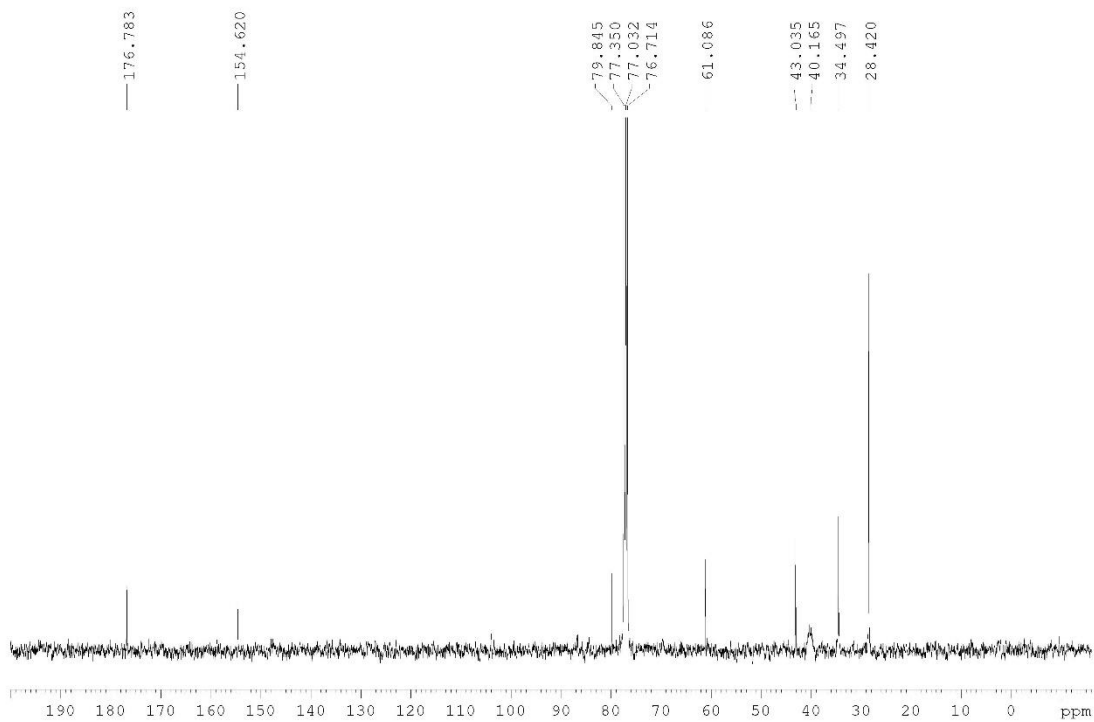



**tert-Butyl 4-((4-methoxyphenyl)imino)piperidine-1-carboxylate (6)**

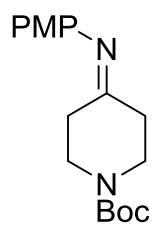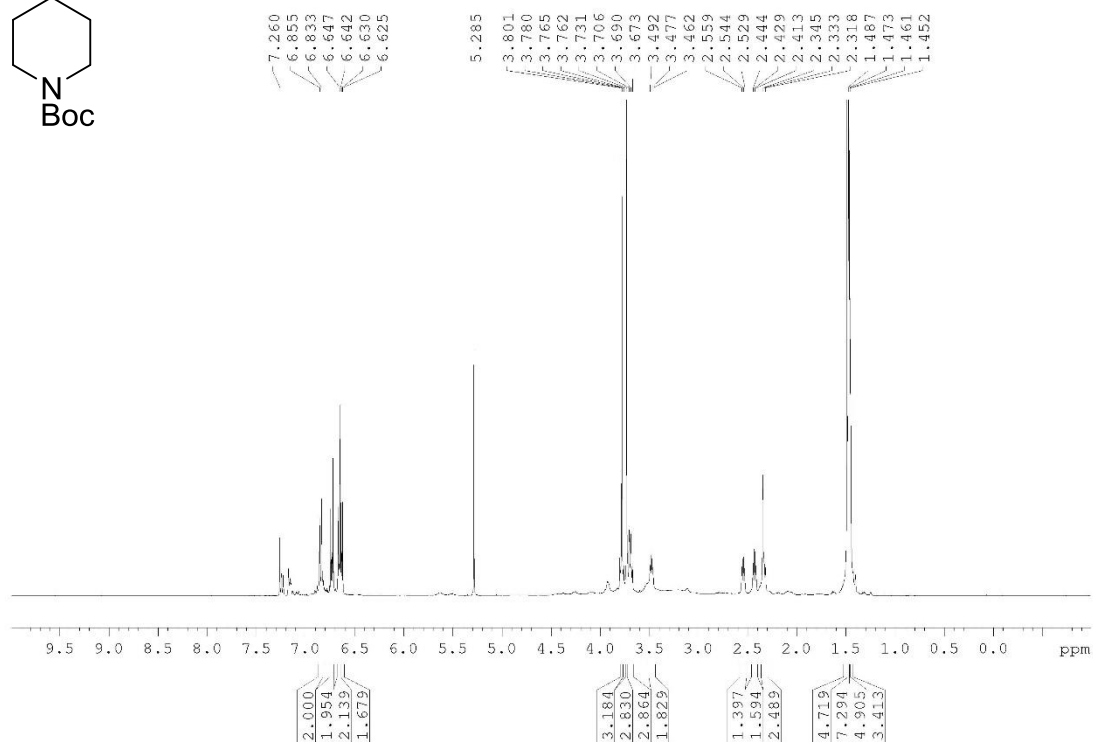

**tert-Butyl 3-acetoxy-1-(4-methoxyphenyl)-2-oxo-1,7-diazaspiro[3.5]nonane-7-carboxylate (10)**

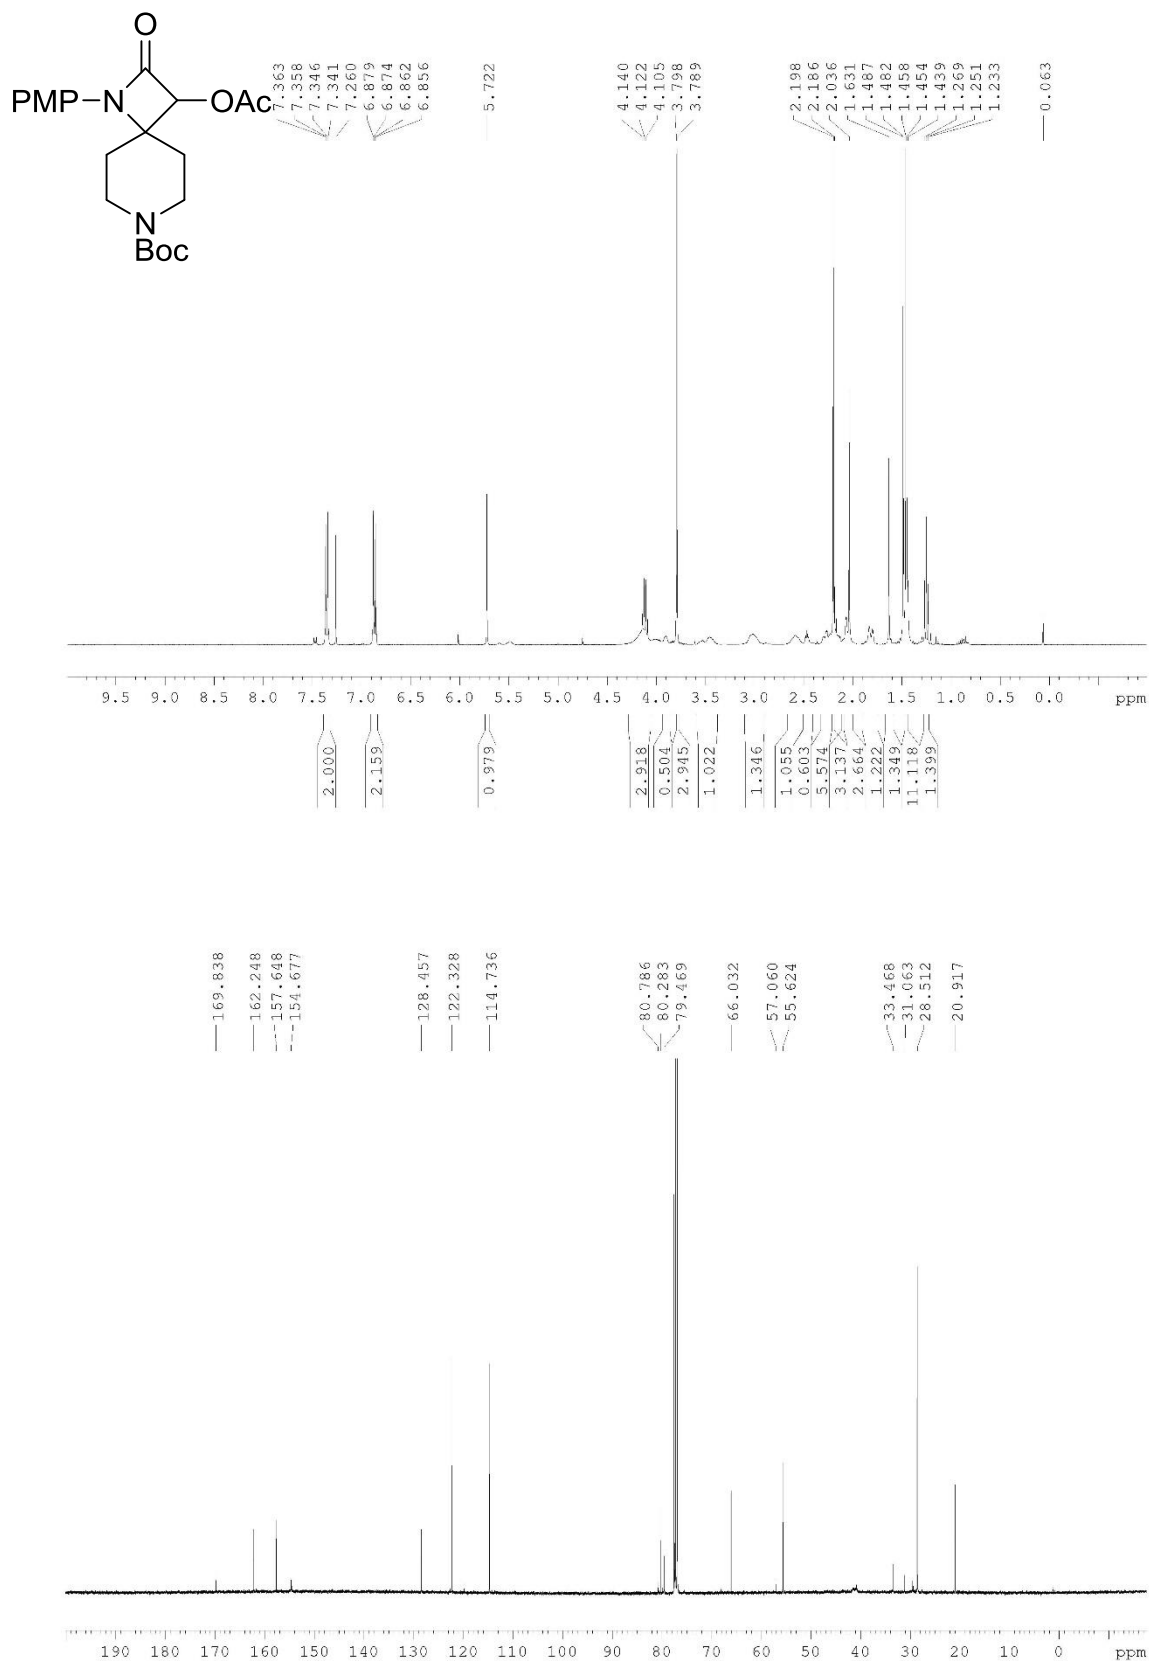

### 3. X-ray Crystallography

#### **3-Phenyl-1,8-dioxa-2,6-diazaspiro[4.4]non-2-en-7-one (3)**

|                                   |                                                               |                       |
|-----------------------------------|---------------------------------------------------------------|-----------------------|
| Identification code               | DS_B1_0017                                                    |                       |
| Empirical formula                 | C <sub>11</sub> H <sub>10</sub> N <sub>2</sub> O <sub>3</sub> |                       |
| Formula weight                    | 218.2120 g mol <sup>-1</sup>                                  |                       |
| Temperature                       | 180(2) K                                                      |                       |
| Wavelength                        | 1.54178 Å                                                     |                       |
| Crystal system                    | Triclinic                                                     |                       |
| Space group                       | P $\bar{1}$ (2)                                               |                       |
| Unit cell dimensions              | a = 5.3405(3) Å                                               | $\alpha$ = 78.073(4)° |
|                                   | b = 8.0452(5) Å                                               | $\beta$ = 77.997(4)°  |
|                                   | c = 12.0561(7) Å                                              | $\gamma$ = 81.581(4)° |
| Volume                            | 492.828 Å <sup>3</sup>                                        |                       |
| Z                                 | 2                                                             |                       |
| Density (calculated)              | 1.470 g cm <sup>-3</sup>                                      |                       |
| Absorption coefficient            | 0.914 mm <sup>-1</sup>                                        |                       |
| F(000)                            | 228                                                           |                       |
| Crystal size                      | 0.180 × 0.040 × 0.020 mm <sup>3</sup>                         |                       |
| Theta range for data collection   | 3.81–66.58°                                                   |                       |
| Index ranges                      | –6 ≤ h ≤ 3, –9 ≤ k ≤ 9, –14 ≤ l ≤ 13                          |                       |
| Reflections collected             | 4038                                                          |                       |
| Independent reflections           | 1723                                                          |                       |
| Completeness to theta =<br>66.58° | 98.7%                                                         |                       |
| Absorption correction             | Multi-scan                                                    |                       |
| Max. and min. transmission        | 0.7528 and 0.6366                                             |                       |
| Refinement method                 | Full-matrix least-squares on F <sup>2</sup>                   |                       |
| Data/restraints/parameters        | 1723/0/149                                                    |                       |
| Goodness-of-fit F <sup>2</sup>    | 1.036                                                         |                       |
| Final R indices [I > 2σ(I)]       | R1 = 0.0482, wR2 = 0.1032                                     |                       |
| R indices (all data)              | R1 = 0.0790, wR2 = 0.1153                                     |                       |
| Largest diff. peak and hole       | 0.224 and –0.250 eÅ <sup>-3</sup>                             |                       |

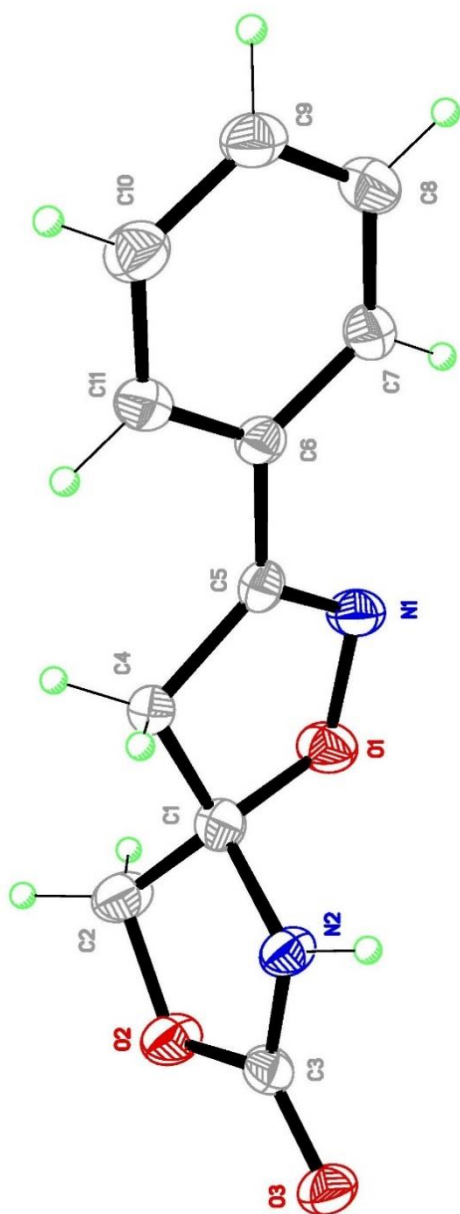

Supplement: EJOC-2019-5219-s001.pdf [file EJOC-2019-5219-s001.pdf]
